# Supplementary material for: Reprogramming of Strawberry (Fragaria vesca) Root Transcriptome in Response to Phytophthora cactorum
Source: PLoS One. 2016 Aug 12;11(8):e0161078. doi: 10.1371/journal.pone.0161078 (PMC4982697; doi:10.1371/journal.pone.0161078)
Supplement: S2 Table — Enriched GO terms (biological processes, molecular functions and cellular components) in the up-regulated and down-regulated gene set. (XLSX) [file pone.0161078.s008.xlsx]

## Sheet: Down_biological_process
GO-ID	Description	p-val	adj p-val	cluster freq	total freq
71554	cell wall organization or biogenesis	3.2743e-55	1.3703e-51	503/2203 22.8%	1512/12384 12.2%
5976	polysaccharide metabolic process	5.634e-49	1.1789e-45	393/2203 17.8%	1116/12384 9.0%
70882	cellular cell wall organization or biogenesis	2.4014e-47	3.35e-44	424/2203 19.2%	1258/12384 10.1%
71555	cell wall organization	3.4986e-46	3.6604e-43	388/2203 17.6%	1121/12384 9.0%
45229	external encapsulating structure organization	8.4161e-41	7.0443e-38	339/2203 15.3%	972/12384 7.8%
71669	plant-type cell wall organization or biogenesis	2.4168e-39	1.6857e-36	316/2203 14.3%	893/12384 7.2%
7047	cellular cell wall organization	2.3539e-38	1.4073e-35	306/2203 13.8%	862/12384 6.9%
44264	cellular polysaccharide metabolic process	3.0336e-37	1.587e-34	309/2203 14.0%	884/12384 7.1%
9832	plant-type cell wall biogenesis	3.663e-34	1.7033e-31	191/2203 8.6%	459/12384 3.7%
44036	cell wall macromolecule metabolic process	1.3674e-33	5.7227e-31	228/2203 10.3%	599/12384 4.8%
271	polysaccharide biosynthetic process	2.3949e-33	9.1114e-31	290/2203 13.1%	844/12384 6.8%
42546	cell wall biogenesis	3.3294e-33	1.1611e-30	246/2203 11.1%	671/12384 5.4%
9664	plant-type cell wall organization	2.1887e-32	7.0458e-30	258/2203 11.7%	725/12384 5.8%
10382	cellular cell wall macromolecule metabolic process	2.8844e-32	8.6222e-30	212/2203 9.6%	549/12384 4.4%
60560	developmental growth involved in morphogenesis	1.3186e-30	3.679e-28	332/2203 15.0%	1047/12384 8.4%
9825	multidimensional cell growth	3.0588e-30	8.0008e-28	132/2203 5.9%	280/12384 2.2%
9826	unidimensional cell growth	1.4841e-29	3.6535e-27	289/2203 13.1%	878/12384 7.0%
16049	cell growth	2.9078e-28	6.4918e-26	359/2203 16.2%	1192/12384 9.6%
9416	response to light stimulus	2.9473e-28	6.4918e-26	484/2203 21.9%	1758/12384 14.1%
48589	developmental growth	5.173e-28	1.0825e-25	345/2203 15.6%	1134/12384 9.1%
272	polysaccharide catabolic process	5.49e-28	1.0941e-25	118/2203 5.3%	246/12384 1.9%
10015	root morphogenesis	2.6865e-27	4.916e-25	275/2203 12.4%	844/12384 6.8%
10817	regulation of hormone levels	2.7018e-27	4.916e-25	311/2203 14.1%	996/12384 8.0%
43478	pigment accumulation in response to UV light	5.968e-27	9.2504e-25	124/2203 5.6%	271/12384 2.1%
43479	pigment accumulation in tissues in response to UV light	5.968e-27	9.2504e-25	124/2203 5.6%	271/12384 2.1%
43480	pigment accumulation in tissues	5.968e-27	9.2504e-25	124/2203 5.6%	271/12384 2.1%
43481	anthocyanin accumulation in tissues in response to UV light	5.968e-27	9.2504e-25	124/2203 5.6%	271/12384 2.1%
44042	glucan metabolic process	6.4116e-27	9.583e-25	210/2203 9.5%	585/12384 4.7%
9628	response to abiotic stimulus	7.3785e-27	1.0648e-24	910/2203 41.3%	3906/12384 31.5%
43476	pigment accumulation	9.1057e-27	1.2702e-24	124/2203 5.6%	272/12384 2.1%
8361	regulation of cell size	1.0649e-26	1.4376e-24	380/2203 17.2%	1306/12384 10.5%
9314	response to radiation	6.5226e-26	8.5304e-24	491/2203 22.2%	1829/12384 14.7%
48646	anatomical structure formation involved in morphogenesis	1.2693e-25	1.6097e-23	585/2203 26.5%	2285/12384 18.4%
32535	regulation of cellular component size	1.7165e-25	2.1129e-23	395/2203 17.9%	1391/12384 11.2%
90066	regulation of anatomical structure size	1.8429e-25	2.2036e-23	396/2203 17.9%	1396/12384 11.2%
48767	root hair elongation	2.3851e-25	2.7727e-23	178/2203 8.0%	475/12384 3.8%
6073	cellular glucan metabolic process	2.6331e-25	2.9783e-23	203/2203 9.2%	572/12384 4.6%
48588	developmental cell growth	1.8421e-24	2.0287e-22	266/2203 12.0%	838/12384 6.7%
10075	regulation of meristem growth	2.1789e-24	2.323e-22	153/2203 6.9%	389/12384 3.1%
10053	root epidermal cell differentiation	2.2204e-24	2.323e-22	237/2203 10.7%	718/12384 5.7%
48364	root development	6.0735e-24	6.1994e-22	331/2203 15.0%	1126/12384 9.0%
22622	root system development	7.178e-24	7.1523e-22	331/2203 15.0%	1127/12384 9.1%
10054	trichoblast differentiation	1.1468e-23	1.1161e-21	232/2203 10.5%	705/12384 5.6%
48509	regulation of meristem development	1.3877e-23	1.3199e-21	165/2203 7.4%	440/12384 3.5%
9932	cell tip growth	4.9937e-23	4.6441e-21	225/2203 10.2%	683/12384 5.5%
16051	carbohydrate biosynthetic process	6.0667e-23	5.5194e-21	452/2203 20.5%	1696/12384 13.6%
9653	anatomical structure morphogenesis	9.1175e-23	8.1185e-21	651/2203 29.5%	2669/12384 21.5%
43473	pigmentation	7.9123e-22	6.8985e-20	124/2203 5.6%	302/12384 2.4%
48764	trichoblast maturation	8.8041e-22	7.3691e-20	221/2203 10.0%	680/12384 5.4%
48765	root hair cell differentiation	8.8041e-22	7.3691e-20	221/2203 10.0%	680/12384 5.4%
60918	auxin transport	1.451e-21	1.1907e-19	119/2203 5.4%	286/12384 2.3%
9411	response to UV	4.6961e-21	3.7795e-19	194/2203 8.8%	577/12384 4.6%
9926	auxin polar transport	2.463e-20	1.9448e-18	115/2203 5.2%	280/12384 2.2%
9914	hormone transport	2.5184e-20	1.9518e-18	120/2203 5.4%	298/12384 2.4%
19748	secondary metabolic process	7.0638e-20	5.3749e-18	419/2203 19.0%	1595/12384 12.8%
10383	cell wall polysaccharide metabolic process	1.4475e-19	1.0817e-17	155/2203 7.0%	436/12384 3.5%
48507	meristem development	1.6425e-19	1.2059e-17	199/2203 9.0%	614/12384 4.9%
9888	tissue development	3.2471e-19	2.3429e-17	458/2203 20.7%	1794/12384 14.4%
16131	brassinosteroid metabolic process	3.6763e-19	2.6077e-17	108/2203 4.9%	263/12384 2.1%
48469	cell maturation	4.4676e-19	3.1162e-17	223/2203 10.1%	720/12384 5.8%
44247	cellular polysaccharide catabolic process	4.7587e-19	3.2648e-17	61/2203 2.7%	110/12384 0.8%
21700	developmental maturation	7.7037e-19	5.2e-17	264/2203 11.9%	901/12384 7.2%
10073	meristem maintenance	8.7091e-19	5.7854e-17	164/2203 7.4%	479/12384 3.8%
9913	epidermal cell differentiation	9.8181e-19	6.4201e-17	250/2203 11.3%	841/12384 6.7%
42545	cell wall modification	1.1457e-18	7.3764e-17	189/2203 8.5%	582/12384 4.6%
32989	cellular component morphogenesis	1.2019e-18	7.6213e-17	366/2203 16.6%	1368/12384 11.0%
5982	starch metabolic process	2.2901e-18	1.4305e-16	112/2203 5.0%	283/12384 2.2%
902	cell morphogenesis	4.4613e-18	2.7457e-16	327/2203 14.8%	1197/12384 9.6%
16128	phytosteroid metabolic process	7.9339e-18	4.8121e-16	109/2203 4.9%	276/12384 2.2%
16132	brassinosteroid biosynthetic process	1.3265e-17	7.9308e-16	88/2203 3.9%	203/12384 1.6%
9637	response to blue light	2.0468e-17	1.2065e-15	80/2203 3.6%	177/12384 1.4%
10089	xylem development	2.4116e-17	1.4018e-15	91/2203 4.1%	215/12384 1.7%
9943	adaxial/abaxial axis specification	5.3311e-17	3.015e-15	76/2203 3.4%	166/12384 1.3%
9944	polarity specification of adaxial/abaxial axis	5.3311e-17	3.015e-15	76/2203 3.4%	166/12384 1.3%
65001	specification of axis polarity	8.1095e-17	4.5251e-15	76/2203 3.4%	167/12384 1.3%
48638	regulation of developmental growth	1.3287e-16	7.3165e-15	166/2203 7.5%	510/12384 4.1%
33692	cellular polysaccharide biosynthetic process	3.1602e-16	1.7176e-14	190/2203 8.6%	615/12384 4.9%
15674	di-, tri-valent inorganic cation transport	3.7353e-16	2.0041e-14	224/2203 10.1%	763/12384 6.1%
16129	phytosteroid biosynthetic process	4.0659e-16	2.1539e-14	89/2203 4.0%	216/12384 1.7%
9955	adaxial/abaxial pattern formation	4.1353e-16	2.1633e-14	76/2203 3.4%	171/12384 1.3%
40007	growth	5.94e-16	3.069e-14	406/2203 18.4%	1610/12384 13.0%
8544	epidermis development	1.0155e-15	5.1202e-14	258/2203 11.7%	921/12384 7.4%
7398	ectoderm development	1.0155e-15	5.1202e-14	258/2203 11.7%	921/12384 7.4%
9269	response to desiccation	1.2002e-15	5.9794e-14	58/2203 2.6%	115/12384 0.9%
10114	response to red light	3.6764e-15	1.8101e-13	72/2203 3.2%	163/12384 1.3%
71365	cellular response to auxin stimulus	7.3001e-15	3.5525e-13	98/2203 4.4%	258/12384 2.0%
9725	response to hormone stimulus	1.7647e-14	8.4888e-13	575/2203 26.1%	2485/12384 20.0%
8202	steroid metabolic process	2.3288e-14	1.1075e-12	164/2203 7.4%	528/12384 4.2%
16052	carbohydrate catabolic process	2.4989e-14	1.1751e-12	234/2203 10.6%	835/12384 6.7%
9734	auxin mediated signaling pathway	5.7635e-14	2.68e-12	91/2203 4.1%	239/12384 1.9%
7389	pattern specification process	1.013e-13	4.6586e-12	210/2203 9.5%	737/12384 5.9%
6694	steroid biosynthetic process	1.606e-13	7.3056e-12	127/2203 5.7%	384/12384 3.1%
52546	cell wall pectin metabolic process	1.8101e-13	7.9742e-12	78/2203 3.5%	195/12384 1.5%
10393	galacturonan metabolic process	1.8101e-13	7.9742e-12	78/2203 3.5%	195/12384 1.5%
45488	pectin metabolic process	1.8101e-13	7.9742e-12	78/2203 3.5%	195/12384 1.5%
34637	cellular carbohydrate biosynthetic process	3.2197e-13	1.4036e-11	360/2203 16.3%	1447/12384 11.6%
65008	regulation of biological quality	3.3672e-13	1.4527e-11	651/2203 29.5%	2913/12384 23.5%
30001	metal ion transport	4.1507e-13	1.7725e-11	277/2203 12.5%	1054/12384 8.5%
70838	divalent metal ion transport	8.024e-13	3.392e-11	150/2203 6.8%	488/12384 3.9%
15979	photosynthesis	9.7081e-13	4.0628e-11	100/2203 4.5%	284/12384 2.2%
10155	regulation of proton transport	1.0762e-12	4.4594e-11	51/2203 2.3%	107/12384 0.8%
9414	response to water deprivation	1.4583e-12	5.9834e-11	224/2203 10.1%	819/12384 6.6%
51707	response to other organism	1.763e-12	7.1045e-11	542/2203 24.6%	2373/12384 19.1%
9415	response to water	1.7655e-12	7.1045e-11	225/2203 10.2%	825/12384 6.6%
5975	carbohydrate metabolic process	4.1661e-12	1.6605e-10	703/2203 31.9%	3220/12384 26.0%
44272	sulfur compound biosynthetic process	4.5168e-12	1.7833e-10	223/2203 10.1%	823/12384 6.6%
9886	post-embryonic morphogenesis	4.8153e-12	1.8834e-10	206/2203 9.3%	746/12384 6.0%
9719	response to endogenous stimulus	6.1417e-12	2.3799e-10	628/2203 28.5%	2833/12384 22.8%
48653	anther development	6.6512e-12	2.5537e-10	71/2203 3.2%	181/12384 1.4%
9069	serine family amino acid metabolic process	7.1967e-12	2.738e-10	128/2203 5.8%	407/12384 3.2%
10087	phloem or xylem histogenesis	8.4816e-12	3.1978e-10	116/2203 5.2%	358/12384 2.8%
48443	stamen development	9.974e-12	3.6939e-10	95/2203 4.3%	274/12384 2.2%
48466	androecium development	9.974e-12	3.6939e-10	95/2203 4.3%	274/12384 2.2%
19757	glycosinolate metabolic process	1.3648e-11	4.9239e-10	126/2203 5.7%	402/12384 3.2%
19760	glucosinolate metabolic process	1.3648e-11	4.9239e-10	126/2203 5.7%	402/12384 3.2%
16143	S-glycoside metabolic process	1.3648e-11	4.9239e-10	126/2203 5.7%	402/12384 3.2%
42547	cell wall modification involved in multidimensional cell growth	2.2566e-11	8.0283e-10	19/2203 0.8%	23/12384 0.1%
19684	photosynthesis, light reaction	2.2637e-11	8.0283e-10	75/2203 3.4%	200/12384 1.6%
42440	pigment metabolic process	2.6421e-11	9.2917e-10	162/2203 7.3%	561/12384 4.5%
9798	axis specification	3.3633e-11	1.173e-09	77/2203 3.4%	209/12384 1.6%
32870	cellular response to hormone stimulus	3.4817e-11	1.2042e-09	362/2203 16.4%	1505/12384 12.1%
50896	response to stimulus	4.1026e-11	1.4073e-09	1421/2203 64.5%	7224/12384 58.3%
45490	pectin catabolic process	5.1842e-11	1.7639e-09	29/2203 1.3%	48/12384 0.3%
10033	response to organic substance	5.8215e-11	1.9648e-09	811/2203 36.8%	3835/12384 30.9%
9755	hormone-mediated signaling pathway	8.1783e-11	2.7381e-09	333/2203 15.1%	1372/12384 11.0%
30243	cellulose metabolic process	8.3612e-11	2.7771e-09	80/2203 3.6%	224/12384 1.8%
8356	asymmetric cell division	1.1067e-10	3.6467e-09	48/2203 2.1%	108/12384 0.8%
9733	response to auxin stimulus	1.3749e-10	4.4795e-09	184/2203 8.3%	671/12384 5.4%
9908	flower development	1.3808e-10	4.4795e-09	241/2203 10.9%	935/12384 7.5%
6812	cation transport	1.5639e-10	5.0228e-09	344/2203 15.6%	1433/12384 11.5%
48367	shoot development	1.5722e-10	5.0228e-09	279/2203 12.6%	1117/12384 9.0%
22621	shoot system development	1.6043e-10	5.0862e-09	280/2203 12.7%	1122/12384 9.0%
71495	cellular response to endogenous stimulus	1.7993e-10	5.6618e-09	371/2203 16.8%	1568/12384 12.6%
19758	glycosinolate biosynthetic process	2.0953e-10	6.4477e-09	113/2203 5.1%	362/12384 2.9%
19761	glucosinolate biosynthetic process	2.0953e-10	6.4477e-09	113/2203 5.1%	362/12384 2.9%
16144	S-glycoside biosynthetic process	2.0953e-10	6.4477e-09	113/2203 5.1%	362/12384 2.9%
16138	glycoside biosynthetic process	2.1274e-10	6.4985e-09	125/2203 5.6%	413/12384 3.3%
15994	chlorophyll metabolic process	2.4186e-10	7.3347e-09	86/2203 3.9%	252/12384 2.0%
9855	determination of bilateral symmetry	2.7547e-10	8.2939e-09	78/2203 3.5%	221/12384 1.7%
10410	hemicellulose metabolic process	2.9532e-10	8.8279e-09	92/2203 4.1%	277/12384 2.2%
55114	oxidation reduction	3.0145e-10	8.9472e-09	492/2203 22.3%	2185/12384 17.6%
42446	hormone biosynthetic process	3.1777e-10	9.3652e-09	149/2203 6.7%	520/12384 4.1%
9799	specification of symmetry	3.5199e-10	1.0301e-08	78/2203 3.5%	222/12384 1.7%
51273	beta-glucan metabolic process	3.6997e-10	1.0752e-08	81/2203 3.6%	234/12384 1.8%
42221	response to chemical stimulus	5.4653e-10	1.5774e-08	1028/2203 46.6%	5056/12384 40.8%
10584	pollen exine formation	5.7054e-10	1.6354e-08	78/2203 3.5%	224/12384 1.8%
6811	ion transport	6.1503e-10	1.751e-08	431/2203 19.5%	1884/12384 15.2%
16137	glycoside metabolic process	6.4124e-10	1.8132e-08	145/2203 6.5%	507/12384 4.0%
9834	secondary cell wall biogenesis	8.6893e-10	2.4406e-08	51/2203 2.3%	124/12384 1.0%
70592	cell wall polysaccharide biosynthetic process	9.9506e-10	2.7762e-08	94/2203 4.2%	291/12384 2.3%
45491	xylan metabolic process	1.1667e-09	3.2334e-08	83/2203 3.7%	247/12384 1.9%
8610	lipid biosynthetic process	1.2132e-09	3.3403e-08	390/2203 17.7%	1686/12384 13.6%
9251	glucan catabolic process	1.4088e-09	3.8535e-08	32/2203 1.4%	62/12384 0.5%
10218	response to far red light	1.446e-09	3.916e-08	58/2203 2.6%	151/12384 1.2%
48439	flower morphogenesis	1.4597e-09	3.916e-08	55/2203 2.4%	140/12384 1.1%
42445	hormone metabolic process	1.4597e-09	3.916e-08	180/2203 8.1%	671/12384 5.4%
6629	lipid metabolic process	1.6968e-09	4.5231e-08	533/2203 24.1%	2421/12384 19.5%
10208	pollen wall assembly	1.8317e-09	4.8516e-08	78/2203 3.5%	229/12384 1.8%
48569	post-embryonic organ development	1.9259e-09	5.069e-08	248/2203 11.2%	993/12384 8.0%
9698	phenylpropanoid metabolic process	1.9509e-09	5.1028e-08	186/2203 8.4%	701/12384 5.6%
6790	sulfur metabolic process	2.0605e-09	5.3561e-08	274/2203 12.4%	1119/12384 9.0%
48532	anatomical structure arrangement	2.1845e-09	5.6433e-08	100/2203 4.5%	320/12384 2.5%
10374	stomatal complex development	2.5553e-09	6.5606e-08	88/2203 3.9%	271/12384 2.1%
70589	cellular component macromolecule biosynthetic process	3.2395e-09	8.2165e-08	94/2203 4.2%	297/12384 2.3%
44038	cell wall macromolecule biosynthetic process	3.2395e-09	8.2165e-08	94/2203 4.2%	297/12384 2.3%
9605	response to external stimulus	3.5006e-09	8.8253e-08	364/2203 16.5%	1569/12384 12.6%
6721	terpenoid metabolic process	3.7126e-09	9.3037e-08	121/2203 5.4%	413/12384 3.3%
48468	cell development	3.7652e-09	9.3794e-08	346/2203 15.7%	1480/12384 11.9%
48437	floral organ development	4.361e-09	1.0799e-07	191/2203 8.6%	731/12384 5.9%
51275	beta-glucan catabolic process	4.4872e-09	1.0982e-07	20/2203 0.9%	30/12384 0.2%
30245	cellulose catabolic process	4.4872e-09	1.0982e-07	20/2203 0.9%	30/12384 0.2%
48513	organ development	4.8616e-09	1.1829e-07	677/2203 30.7%	3194/12384 25.7%
19252	starch biosynthetic process	5.2941e-09	1.2807e-07	68/2203 3.0%	194/12384 1.5%
10014	meristem initiation	5.5598e-09	1.3372e-07	78/2203 3.5%	234/12384 1.8%
9933	meristem structural organization	6.6461e-09	1.5894e-07	95/2203 4.3%	305/12384 2.4%
80001	mucilage extrusion from seed coat	7.8844e-09	1.8748e-07	16/2203 0.7%	21/12384 0.1%
10154	fruit development	8.8425e-09	2.0907e-07	264/2203 11.9%	1086/12384 8.7%
16114	terpenoid biosynthetic process	9.8033e-09	2.3049e-07	106/2203 4.8%	354/12384 2.8%
9250	glucan biosynthetic process	1.0126e-08	2.3675e-07	98/2203 4.4%	320/12384 2.5%
10413	glucuronoxylan metabolic process	1.0689e-08	2.4715e-07	77/2203 3.4%	233/12384 1.8%
45492	xylan biosynthetic process	1.0689e-08	2.4715e-07	77/2203 3.4%	233/12384 1.8%
9607	response to biotic stimulus	1.1411e-08	2.6239e-07	591/2203 26.8%	2754/12384 22.2%
9651	response to salt stress	1.2382e-08	2.8317e-07	330/2203 14.9%	1415/12384 11.4%
10035	response to inorganic substance	1.4634e-08	3.3284e-07	506/2203 22.9%	2314/12384 18.6%
9639	response to red or far red light	1.4917e-08	3.3745e-07	148/2203 6.7%	543/12384 4.3%
9827	plant-type cell wall modification	1.5285e-08	3.4392e-07	107/2203 4.8%	361/12384 2.9%
10167	response to nitrate	1.6044e-08	3.5906e-07	129/2203 5.8%	458/12384 3.6%
10103	stomatal complex morphogenesis	1.9248e-08	4.2848e-07	79/2203 3.5%	244/12384 1.9%
9767	photosynthetic electron transport chain	2.3199e-08	5.137e-07	26/2203 1.1%	49/12384 0.3%
48869	cellular developmental process	2.9612e-08	6.5225e-07	529/2203 24.0%	2445/12384 19.7%
7020	microtubule nucleation	4.1547e-08	9.1034e-07	70/2203 3.1%	211/12384 1.7%
48438	floral whorl development	4.5815e-08	9.9863e-07	163/2203 7.3%	621/12384 5.0%
55080	cation homeostasis	4.8864e-08	1.0596e-06	131/2203 5.9%	475/12384 3.8%
10051	xylem and phloem pattern formation	5.1165e-08	1.1037e-06	93/2203 4.2%	308/12384 2.4%
15706	nitrate transport	5.9947e-08	1.2866e-06	126/2203 5.7%	454/12384 3.6%
10227	floral organ abscission	6.1516e-08	1.3135e-06	32/2203 1.4%	70/12384 0.5%
44111	development involved in symbiotic interaction	6.3435e-08	1.3476e-06	18/2203 0.8%	28/12384 0.2%
97	sulfur amino acid biosynthetic process	6.3859e-08	1.3497e-06	131/2203 5.9%	477/12384 3.8%
44283	small molecule biosynthetic process	6.5424e-08	1.3759e-06	638/2203 28.9%	3033/12384 24.4%
9617	response to bacterium	6.8667e-08	1.4368e-06	304/2203 13.7%	1307/12384 10.5%
30003	cellular cation homeostasis	8.3209e-08	1.7325e-06	119/2203 5.4%	425/12384 3.4%
6519	cellular amino acid and derivative metabolic process	9.5337e-08	1.9752e-06	427/2203 19.3%	1935/12384 15.6%
16126	sterol biosynthetic process	9.8564e-08	2.032e-06	82/2203 3.7%	265/12384 2.1%
33013	tetrapyrrole metabolic process	1.0827e-07	2.221e-06	88/2203 3.9%	291/12384 2.3%
34285	response to disaccharide stimulus	1.1269e-07	2.3005e-06	105/2203 4.7%	365/12384 2.9%
9070	serine family amino acid biosynthetic process	1.3908e-07	2.8131e-06	96/2203 4.3%	327/12384 2.6%
9744	response to sucrose stimulus	1.3914e-07	2.8131e-06	104/2203 4.7%	362/12384 2.9%
44275	cellular carbohydrate catabolic process	1.4269e-07	2.871e-06	188/2203 8.5%	749/12384 6.0%
19344	cysteine biosynthetic process	1.4674e-07	2.9384e-06	92/2203 4.1%	310/12384 2.5%
48878	chemical homeostasis	1.5033e-07	2.9958e-06	182/2203 8.2%	721/12384 5.8%
48856	anatomical structure development	1.5924e-07	3.1526e-06	928/2203 42.1%	4619/12384 37.2%
6970	response to osmotic stress	1.597e-07	3.1526e-06	342/2203 15.5%	1509/12384 12.1%
33993	response to lipid	1.6154e-07	3.174e-06	339/2203 15.3%	1494/12384 12.0%
9878	nodule morphogenesis	1.6544e-07	3.2354e-06	16/2203 0.7%	24/12384 0.1%
6826	iron ion transport	1.7015e-07	3.3119e-06	98/2203 4.4%	337/12384 2.7%
10106	cellular response to iron ion starvation	1.7604e-07	3.4107e-06	81/2203 3.6%	264/12384 2.1%
6778	porphyrin metabolic process	1.9853e-07	3.8289e-06	86/2203 3.9%	286/12384 2.3%
9838	abscission	2.0194e-07	3.8767e-06	48/2203 2.1%	131/12384 1.0%
42742	defense response to bacterium	2.0502e-07	3.9178e-06	252/2203 11.4%	1063/12384 8.5%
51704	multi-organism process	2.0834e-07	3.9632e-06	648/2203 29.4%	3108/12384 25.0%
6873	cellular ion homeostasis	2.1992e-07	4.1645e-06	130/2203 5.9%	482/12384 3.8%
9624	response to nematode	2.392e-07	4.5092e-06	100/2203 4.5%	348/12384 2.8%
9266	response to temperature stimulus	2.6588e-07	4.9897e-06	318/2203 14.4%	1395/12384 11.2%
16125	sterol metabolic process	2.757e-07	5.1509e-06	95/2203 4.3%	327/12384 2.6%
6534	cysteine metabolic process	3.2704e-07	6.083e-06	92/2203 4.1%	315/12384 2.5%
6816	calcium ion transport	3.8098e-07	7.0548e-06	83/2203 3.7%	277/12384 2.2%
9638	phototropism	3.8349e-07	7.07e-06	16/2203 0.7%	25/12384 0.2%
6720	isoprenoid metabolic process	4.1534e-07	7.6237e-06	166/2203 7.5%	655/12384 5.2%
9409	response to cold	4.3806e-07	8.0056e-06	221/2203 10.0%	920/12384 7.4%
6952	defense response	4.4695e-07	8.1245e-06	518/2203 23.5%	2434/12384 19.6%
9739	response to gibberellin stimulus	4.5018e-07	8.1245e-06	83/2203 3.7%	278/12384 2.2%
46148	pigment biosynthetic process	4.5039e-07	8.1245e-06	118/2203 5.3%	433/12384 3.4%
10016	shoot morphogenesis	4.8731e-07	8.7527e-06	172/2203 7.8%	685/12384 5.5%
44262	cellular carbohydrate metabolic process	5.2306e-07	9.3548e-06	615/2203 27.9%	2950/12384 23.8%
16117	carotenoid biosynthetic process	5.5835e-07	9.9013e-06	42/2203 1.9%	112/12384 0.9%
16109	tetraterpenoid biosynthetic process	5.5835e-07	9.9013e-06	42/2203 1.9%	112/12384 0.9%
9860	pollen tube growth	6.2535e-07	1.1043e-05	117/2203 5.3%	431/12384 3.4%
48731	system development	7.6654e-07	1.3479e-05	789/2203 35.8%	3894/12384 31.4%
23	maltose metabolic process	7.771e-07	1.3607e-05	55/2203 2.4%	164/12384 1.3%
70887	cellular response to chemical stimulus	8.2461e-07	1.4379e-05	574/2203 26.0%	2741/12384 22.1%
9750	response to fructose stimulus	1.0024e-06	1.7407e-05	86/2203 3.9%	296/12384 2.3%
16053	organic acid biosynthetic process	1.0859e-06	1.8702e-05	396/2203 17.9%	1814/12384 14.6%
46394	carboxylic acid biosynthetic process	1.0859e-06	1.8702e-05	396/2203 17.9%	1814/12384 14.6%
50801	ion homeostasis	1.1188e-06	1.9189e-05	143/2203 6.4%	556/12384 4.4%
15995	chlorophyll biosynthetic process	1.198e-06	2.0463e-05	37/2203 1.6%	96/12384 0.7%
16116	carotenoid metabolic process	1.2674e-06	2.1474e-05	42/2203 1.9%	115/12384 0.9%
16108	tetraterpenoid metabolic process	1.2674e-06	2.1474e-05	42/2203 1.9%	115/12384 0.9%
8299	isoprenoid biosynthetic process	1.2956e-06	2.1863e-05	151/2203 6.8%	595/12384 4.8%
9791	post-embryonic development	1.3747e-06	2.3105e-05	544/2203 24.6%	2592/12384 20.9%
3002	regionalization	1.8764e-06	3.1411e-05	139/2203 6.3%	542/12384 4.3%
9773	photosynthetic electron transport in photosystem I	1.9125e-06	3.1888e-05	17/2203 0.7%	30/12384 0.2%
10229	inflorescence development	2.1236e-06	3.5266e-05	27/2203 1.2%	62/12384 0.5%
10047	fruit dehiscence	2.489e-06	4.1172e-05	12/2203 0.5%	17/12384 0.1%
9736	cytokinin mediated signaling pathway	2.6522e-06	4.3528e-05	36/2203 1.6%	95/12384 0.7%
71368	cellular response to cytokinin stimulus	2.6522e-06	4.3528e-05	36/2203 1.6%	95/12384 0.7%
9835	ripening	3.3325e-06	5.4478e-05	32/2203 1.4%	81/12384 0.6%
9765	photosynthesis, light harvesting	3.5337e-06	5.7542e-05	17/2203 0.7%	31/12384 0.2%
41	transition metal ion transport	4.2828e-06	6.9471e-05	142/2203 6.4%	564/12384 4.5%
8652	cellular amino acid biosynthetic process	4.3262e-06	6.9904e-05	192/2203 8.7%	805/12384 6.5%
52541	plant-type cell wall cellulose metabolic process	4.4471e-06	7.1581e-05	27/2203 1.2%	64/12384 0.5%
55082	cellular chemical homeostasis	4.7118e-06	7.5552e-05	131/2203 5.9%	513/12384 4.1%
18298	protein-chromophore linkage	6.186e-06	9.8811e-05	16/2203 0.7%	29/12384 0.2%
9785	blue light signaling pathway	6.2911e-06	0.00010011	17/2203 0.7%	32/12384 0.2%
9699	phenylpropanoid biosynthetic process	6.4089e-06	0.0001016	142/2203 6.4%	568/12384 4.5%
40008	regulation of growth	6.7796e-06	0.00010707	210/2203 9.5%	899/12384 7.2%
15698	inorganic anion transport	7.2685e-06	0.00011436	163/2203 7.3%	670/12384 5.4%
9820	alkaloid metabolic process	7.3229e-06	0.00011478	45/2203 2.0%	134/12384 1.0%
9740	gibberellic acid mediated signaling pathway	7.8093e-06	0.00012104	53/2203 2.4%	167/12384 1.3%
9808	lignin metabolic process	7.8093e-06	0.00012104	53/2203 2.4%	167/12384 1.3%
10476	gibberellin mediated signaling pathway	7.8093e-06	0.00012104	53/2203 2.4%	167/12384 1.3%
48868	pollen tube development	7.8543e-06	0.00012129	127/2203 5.7%	499/12384 4.0%
9309	amine biosynthetic process	8.1265e-06	0.00012503	199/2203 9.0%	847/12384 6.8%
10191	mucilage metabolic process	8.5674e-06	0.00013086	20/2203 0.9%	42/12384 0.3%
6949	syncytium formation	8.5674e-06	0.00013086	20/2203 0.9%	42/12384 0.3%
71310	cellular response to organic substance	9.1414e-06	0.00013912	472/2203 21.4%	2249/12384 18.1%
9753	response to jasmonic acid stimulus	9.5158e-06	0.00014429	221/2203 10.0%	958/12384 7.7%
10214	seed coat development	1.0823e-05	0.00016303	24/2203 1.0%	56/12384 0.4%
71483	cellular response to blue light	1.083e-05	0.00016303	17/2203 0.7%	33/12384 0.2%
71370	cellular response to gibberellin stimulus	1.1441e-05	0.00017162	53/2203 2.4%	169/12384 1.3%
46271	phenylpropanoid catabolic process	1.17e-05	0.00017425	21/2203 0.9%	46/12384 0.3%
46274	lignin catabolic process	1.17e-05	0.00017425	21/2203 0.9%	46/12384 0.3%
9737	response to abscisic acid stimulus	1.3461e-05	0.00019895	246/2203 11.1%	1088/12384 8.7%
15996	chlorophyll catabolic process	1.3501e-05	0.00019895	47/2203 2.1%	145/12384 1.1%
46149	pigment catabolic process	1.3501e-05	0.00019895	47/2203 2.1%	145/12384 1.1%
9735	response to cytokinin stimulus	1.3869e-05	0.00020365	61/2203 2.7%	204/12384 1.6%
6833	water transport	1.3973e-05	0.00020447	79/2203 3.5%	283/12384 2.2%
48827	phyllome development	1.6127e-05	0.00023516	194/2203 8.8%	831/12384 6.7%
42044	fluid transport	1.8408e-05	0.00026749	79/2203 3.5%	285/12384 2.3%
33015	tetrapyrrole catabolic process	2.0166e-05	0.00029101	47/2203 2.1%	147/12384 1.1%
6787	porphyrin catabolic process	2.0166e-05	0.00029101	47/2203 2.1%	147/12384 1.1%
65007	biological regulation	2.0386e-05	0.0002925	1306/2203 59.2%	6852/12384 55.3%
31540	regulation of anthocyanin biosynthetic process	2.0409e-05	0.0002925	20/2203 0.9%	44/12384 0.3%
48316	seed development	2.1171e-05	0.0003024	225/2203 10.2%	989/12384 7.9%
6091	generation of precursor metabolites and energy	2.4019e-05	0.0003419	180/2203 8.1%	767/12384 6.1%
9743	response to carbohydrate stimulus	2.8278e-05	0.00040116	325/2203 14.7%	1503/12384 12.1%
7030	Golgi organization	2.8641e-05	0.00040494	96/2203 4.3%	366/12384 2.9%
43269	regulation of ion transport	3.0012e-05	0.0004229	116/2203 5.2%	460/12384 3.7%
6972	hyperosmotic response	3.3064e-05	0.00046434	133/2203 6.0%	542/12384 4.3%
35295	tube development	3.347e-05	0.00046847	139/2203 6.3%	571/12384 4.6%
9962	regulation of flavonoid biosynthetic process	3.4022e-05	0.00047316	92/2203 4.1%	349/12384 2.8%
31668	cellular response to extracellular stimulus	3.4031e-05	0.00047316	172/2203 7.8%	732/12384 5.9%
31537	regulation of anthocyanin metabolic process	3.4417e-05	0.00047693	28/2203 1.2%	74/12384 0.5%
10927	cellular component assembly involved in morphogenesis	3.583e-05	0.00049488	79/2203 3.5%	290/12384 2.3%
9746	response to hexose stimulus	3.6054e-05	0.00049634	96/2203 4.3%	368/12384 2.9%
15843	methylammonium transport	3.78e-05	0.00051866	7/2203 0.3%	8/12384 0.0%
9812	flavonoid metabolic process	3.9056e-05	0.00053415	98/2203 4.4%	378/12384 3.0%
5977	glycogen metabolic process	4.3082e-05	0.00058729	24/2203 1.0%	60/12384 0.4%
6950	response to stress	4.3441e-05	0.00059026	1038/2203 47.1%	5366/12384 43.3%
34614	cellular response to reactive oxygen species	4.6047e-05	0.00062364	67/2203 3.0%	238/12384 1.9%
48359	mucilage metabolic process involved seed coat development	4.6443e-05	0.00062698	17/2203 0.7%	36/12384 0.2%
42219	cellular amino acid derivative catabolic process	4.9674e-05	0.00066753	78/2203 3.5%	288/12384 2.3%
9741	response to brassinosteroid stimulus	4.9765e-05	0.00066753	68/2203 3.0%	243/12384 1.9%
34284	response to monosaccharide stimulus	5.0562e-05	0.00067604	96/2203 4.3%	371/12384 2.9%
32502	developmental process	5.5201e-05	0.00073572	985/2203 44.7%	5078/12384 41.0%
19755	one-carbon compound transport	6.2921e-05	0.00083595	9/2203 0.4%	13/12384 0.1%
71496	cellular response to external stimulus	6.3597e-05	0.00084226	172/2203 7.8%	740/12384 5.9%
6575	cellular amino acid derivative metabolic process	6.5962e-05	0.00087083	272/2203 12.3%	1245/12384 10.0%
9911	positive regulation of flower development	8.7354e-05	0.0011496	33/2203 1.4%	97/12384 0.7%
15840	urea transport	9.7994e-05	0.0012856	8/2203 0.3%	11/12384 0.0%
46165	alcohol biosynthetic process	9.8963e-05	0.0012943	225/2203 10.2%	1012/12384 8.1%
5978	glycogen biosynthetic process	0.00010202	0.00133	11/2203 0.4%	19/12384 0.1%
48829	root cap development	0.00010741	0.001396	12/2203 0.5%	22/12384 0.1%
80022	primary root development	0.00011291	0.0014629	19/2203 0.8%	45/12384 0.3%
96	sulfur amino acid metabolic process	0.00011525	0.0014887	170/2203 7.7%	738/12384 5.9%
9900	dehiscence	0.00012204	0.0015715	22/2203 0.9%	56/12384 0.4%
9555	pollen development	0.00013219	0.001697	130/2203 5.9%	543/12384 4.3%
70301	cellular response to hydrogen peroxide	0.00013293	0.001699	57/2203 2.5%	201/12384 1.6%
43436	oxoacid metabolic process	0.00013316	0.001699	595/2203 27.0%	2966/12384 23.9%
43455	regulation of secondary metabolic process	0.00014013	0.0017825	106/2203 4.8%	428/12384 3.4%
10268	brassinosteroid homeostasis	0.00014998	0.001902	21/2203 0.9%	53/12384 0.4%
6082	organic acid metabolic process	0.00015074	0.0019059	597/2203 27.0%	2980/12384 24.0%
6820	anion transport	0.00015425	0.0019444	252/2203 11.4%	1157/12384 9.3%
48608	reproductive structure development	0.0001568	0.0019706	433/2203 19.6%	2103/12384 16.9%
9877	nodulation	0.00016055	0.0020117	19/2203 0.8%	46/12384 0.3%
9751	response to salicylic acid stimulus	0.00016485	0.0020594	210/2203 9.5%	944/12384 7.6%
71258	cellular response to gravity	0.00017748	0.002204	5/2203 0.2%	5/12384 0.0%
10196	nonphotochemical quenching	0.00017748	0.002204	5/2203 0.2%	5/12384 0.0%
9813	flavonoid biosynthetic process	0.0001866	0.0023089	90/2203 4.0%	355/12384 2.8%
9768	photosynthesis, light harvesting in photosystem I	0.00018703	0.0023089	6/2203 0.2%	7/12384 0.0%
14070	response to organic cyclic substance	0.00019952	0.0024558	348/2203 15.7%	1660/12384 13.4%
2238	response to molecule of fungal origin	0.0002047	0.0025123	21/2203 0.9%	54/12384 0.4%
9642	response to light intensity	0.000209	0.0025575	94/2203 4.2%	375/12384 3.0%
42180	cellular ketone metabolic process	0.0002138	0.0026087	599/2203 27.1%	3000/12384 24.2%
42886	amide transport	0.00022001	0.0026765	62/2203 2.8%	227/12384 1.8%
7275	multicellular organismal development	0.00024532	0.0029758	937/2203 42.5%	4856/12384 39.2%
10207	photosystem II assembly	0.00027013	0.0032673	30/2203 1.3%	90/12384 0.7%
31669	cellular response to nutrient levels	0.00028658	0.0034563	151/2203 6.8%	656/12384 5.2%
16101	diterpenoid metabolic process	0.00029166	0.0035075	49/2203 2.2%	171/12384 1.3%
45176	apical protein localization	0.00031592	0.0037883	12/2203 0.5%	24/12384 0.1%
10224	response to UV-B	0.00032142	0.0038433	69/2203 3.1%	262/12384 2.1%
7154	cell communication	0.00032258	0.0038461	682/2203 30.9%	3462/12384 27.9%
6084	acetyl-CoA metabolic process	0.00033001	0.0039235	56/2203 2.5%	203/12384 1.6%
42744	hydrogen peroxide catabolic process	0.00033871	0.0040156	49/2203 2.2%	172/12384 1.3%
46777	protein amino acid autophosphorylation	0.00035186	0.0041597	91/2203 4.1%	366/12384 2.9%
9267	cellular response to starvation	0.00037959	0.0044646	146/2203 6.6%	635/12384 5.1%
19752	carboxylic acid metabolic process	0.00037978	0.0044646	578/2203 26.2%	2902/12384 23.4%
15833	peptide transport	0.00043126	0.0050556	56/2203 2.5%	205/12384 1.6%
30154	cell differentiation	0.0004456	0.005209	425/2203 19.2%	2085/12384 16.8%
9901	anther dehiscence	0.00045911	0.005352	20/2203 0.9%	53/12384 0.4%
42128	nitrate assimilation	0.00046806	0.0054412	17/2203 0.7%	42/12384 0.3%
42538	hyperosmotic salinity response	0.0004722	0.0054741	96/2203 4.3%	393/12384 3.1%
9718	anthocyanin biosynthetic process	0.00049395	0.0057105	52/2203 2.3%	188/12384 1.5%
16102	diterpenoid biosynthetic process	0.00051252	0.0059088	42/2203 1.9%	144/12384 1.1%
9954	proximal/distal pattern formation	0.00052433	0.0060284	18/2203 0.8%	46/12384 0.3%
186	activation of MAPKK activity	0.00053296	0.0061108	44/2203 1.9%	153/12384 1.2%
46688	response to copper ion	0.00053903	0.0061635	26/2203 1.1%	77/12384 0.6%
5984	disaccharide metabolic process	0.00055233	0.0062983	58/2203 2.6%	216/12384 1.7%
42398	cellular amino acid derivative biosynthetic process	0.00055424	0.0063029	201/2203 9.1%	918/12384 7.4%
9635	response to herbicide	0.00056373	0.0063819	11/2203 0.4%	22/12384 0.1%
46283	anthocyanin metabolic process	0.00056423	0.0063819	54/2203 2.4%	198/12384 1.5%
32260	response to jasmonic acid stimulus involved in jasmonic acid and ethylene-dependent systemic resistance	0.00063472	0.0071599	6/2203 0.2%	8/12384 0.0%
9686	gibberellin biosynthetic process	0.00067112	0.0075501	37/2203 1.6%	124/12384 1.0%
6112	energy reserve metabolic process	0.00067719	0.0075979	24/2203 1.0%	70/12384 0.5%
48582	positive regulation of post-embryonic development	0.00070567	0.0078964	36/2203 1.6%	120/12384 0.9%
9685	gibberellin metabolic process	0.00071121	0.0078973	39/2203 1.7%	133/12384 1.0%
10162	seed dormancy	0.00071142	0.0078973	66/2203 2.9%	255/12384 2.0%
22611	dormancy process	0.00071142	0.0078973	66/2203 2.9%	255/12384 2.0%
6857	oligopeptide transport	0.00073832	0.0081743	52/2203 2.3%	191/12384 1.5%
48366	leaf development	0.00082166	0.0090729	172/2203 7.8%	777/12384 6.2%
19725	cellular homeostasis	0.00082675	0.0091051	141/2203 6.4%	621/12384 5.0%
33014	tetrapyrrole biosynthetic process	0.00083415	0.0091625	39/2203 1.7%	134/12384 1.0%
9610	response to symbiotic fungus	0.00083699	0.0091697	26/2203 1.1%	79/12384 0.6%
34599	cellular response to oxidative stress	0.00085432	0.0093351	68/2203 3.0%	266/12384 2.1%
52386	cell wall thickening	0.00086539	0.0094314	41/2203 1.8%	143/12384 1.1%
10109	regulation of photosynthesis	0.00088194	0.0095868	17/2203 0.7%	44/12384 0.3%
10021	amylopectin biosynthetic process	0.00090731	0.009837	5/2203 0.2%	6/12384 0.0%
51187	cofactor catabolic process	0.0010256	0.011091	51/2203 2.3%	189/12384 1.5%
80086	stamen filament development	0.0010717	0.0115	8/2203 0.3%	14/12384 0.1%
19682	glyceraldehyde-3-phosphate metabolic process	0.0010717	0.0115	72/2203 3.2%	287/12384 2.3%
19288	isopentenyl diphosphate biosynthetic process, mevalonate-independent pathway	0.0010717	0.0115	72/2203 3.2%	287/12384 2.3%
6779	porphyrin biosynthetic process	0.0010959	0.01173	37/2203 1.6%	127/12384 1.0%
42126	nitrate metabolic process	0.0011855	0.012652	17/2203 0.7%	45/12384 0.3%
48511	rhythmic process	0.0011881	0.012652	65/2203 2.9%	255/12384 2.0%
6740	NADPH regeneration	0.0012733	0.013525	46/2203 2.0%	168/12384 1.3%
9958	positive gravitropism	0.0013508	0.014311	21/2203 0.9%	61/12384 0.4%
50793	regulation of developmental process	0.0013754	0.014536	277/2203 12.5%	1329/12384 10.7%
90354	regulation of auxin metabolic process	0.0014087	0.01485	11/2203 0.4%	24/12384 0.1%
42214	terpene metabolic process	0.0015122	0.015901	31/2203 1.4%	103/12384 0.8%
51239	regulation of multicellular organismal process	0.001555	0.01631	270/2203 12.2%	1295/12384 10.4%
7043	cell-cell junction assembly	0.0016166	0.016914	6/2203 0.2%	9/12384 0.0%
9240	isopentenyl diphosphate biosynthetic process	0.0016303	0.016972	73/2203 3.3%	296/12384 2.3%
46490	isopentenyl diphosphate metabolic process	0.0016303	0.016972	73/2203 3.3%	296/12384 2.3%
10065	primary meristem tissue development	0.0016815	0.017461	19/2203 0.8%	54/12384 0.4%
9991	response to extracellular stimulus	0.0017291	0.017912	185/2203 8.3%	856/12384 6.9%
6098	pentose-phosphate shunt	0.001777	0.018362	45/2203 2.0%	166/12384 1.3%
35383	thioester metabolic process	0.0017915	0.018421	58/2203 2.6%	226/12384 1.8%
6637	acyl-CoA metabolic process	0.0017915	0.018421	58/2203 2.6%	226/12384 1.8%
9644	response to high light intensity	0.0018059	0.018524	65/2203 2.9%	259/12384 2.0%
71396	cellular response to lipid	0.0019289	0.019737	159/2203 7.2%	725/12384 5.8%
42938	dipeptide transport	0.0020608	0.021035	13/2203 0.5%	32/12384 0.2%
10067	procambium histogenesis	0.0021189	0.021576	18/2203 0.8%	51/12384 0.4%
10345	suberin biosynthetic process	0.0021519	0.021859	20/2203 0.9%	59/12384 0.4%
9902	chloroplast relocation	0.0022382	0.02257	30/2203 1.3%	101/12384 0.8%
51667	establishment of plastid localization	0.0022382	0.02257	30/2203 1.3%	101/12384 0.8%
50826	response to freezing	0.0022382	0.02257	30/2203 1.3%	101/12384 0.8%
15804	neutral amino acid transport	0.0022638	0.022774	66/2203 2.9%	266/12384 2.1%
48656	tapetal layer formation	0.0024715	0.024744	15/2203 0.6%	40/12384 0.3%
48657	tapetal cell differentiation	0.0024715	0.024744	15/2203 0.6%	40/12384 0.3%
17000	antibiotic biosynthetic process	0.0025036	0.025006	10/2203 0.4%	22/12384 0.1%
80052	response to histidine	0.0025279	0.025129	12/2203 0.5%	29/12384 0.2%
80053	response to phenylalanine	0.0025279	0.025129	12/2203 0.5%	29/12384 0.2%
51644	plastid localization	0.0026418	0.026199	30/2203 1.3%	102/12384 0.8%
9682	induced systemic resistance	0.0026567	0.026285	21/2203 0.9%	64/12384 0.5%
9608	response to symbiont	0.0027289	0.026935	26/2203 1.1%	85/12384 0.6%
71369	cellular response to ethylene stimulus	0.0028015	0.027587	72/2203 3.2%	297/12384 2.3%
9647	skotomorphogenesis	0.0028539	0.028036	13/2203 0.5%	33/12384 0.2%
6739	NADP metabolic process	0.0028667	0.028097	47/2203 2.1%	179/12384 1.4%
52543	callose deposition in cell wall	0.0028875	0.028191	38/2203 1.7%	138/12384 1.1%
32501	multicellular organismal process	0.0028899	0.028191	968/2203 43.9%	5113/12384 41.2%
9828	plant-type cell wall loosening	0.0029077	0.0283	9/2203 0.4%	19/12384 0.1%
9723	response to ethylene stimulus	0.003064	0.029751	150/2203 6.8%	687/12384 5.5%
9909	regulation of flower development	0.0031718	0.030661	93/2203 4.2%	401/12384 3.2%
60871	cellular cell wall disassembly	0.003187	0.030661	22/2203 0.9%	69/12384 0.5%
9830	cell wall modification involved in abscission	0.003187	0.030661	22/2203 0.9%	69/12384 0.5%
44277	cell wall disassembly	0.003187	0.030661	22/2203 0.9%	69/12384 0.5%
10223	secondary shoot formation	0.0032663	0.03128	15/2203 0.6%	41/12384 0.3%
10346	shoot formation	0.0032663	0.03128	15/2203 0.6%	41/12384 0.3%
45493	xylan catabolic process	0.0032785	0.031325	8/2203 0.3%	16/12384 0.1%
32787	monocarboxylic acid metabolic process	0.0033281	0.031727	447/2203 20.2%	2257/12384 18.2%
9856	pollination	0.0033973	0.032313	142/2203 6.4%	648/12384 5.2%
5980	glycogen catabolic process	0.0035165	0.033371	7/2203 0.3%	13/12384 0.1%
10027	thylakoid membrane organization	0.003549	0.033452	60/2203 2.7%	242/12384 1.9%
9668	plastid membrane organization	0.003549	0.033452	60/2203 2.7%	242/12384 1.9%
15824	proline transport	0.003549	0.033452	60/2203 2.7%	242/12384 1.9%
90355	positive regulation of auxin metabolic process	0.003731	0.03481	10/2203 0.4%	23/12384 0.1%
90357	regulation of tryptophan metabolic process	0.003731	0.03481	10/2203 0.4%	23/12384 0.1%
90358	positive regulation of tryptophan metabolic process	0.003731	0.03481	10/2203 0.4%	23/12384 0.1%
45764	positive regulation of cellular amino acid metabolic process	0.003731	0.03481	10/2203 0.4%	23/12384 0.1%
7018	microtubule-based movement	0.0037347	0.03481	23/2203 1.0%	74/12384 0.5%
9687	abscisic acid metabolic process	0.003882	0.036103	22/2203 0.9%	70/12384 0.5%
51186	cofactor metabolic process	0.003937	0.036533	226/2203 10.2%	1085/12384 8.7%
9809	lignin biosynthetic process	0.0039843	0.03689	31/2203 1.4%	109/12384 0.8%
7017	microtubule-based process	0.0040287	0.037219	143/2203 6.4%	656/12384 5.2%
43288	apocarotenoid metabolic process	0.0040867	0.037672	25/2203 1.1%	83/12384 0.6%
52325	cell wall pectin biosynthetic process	0.0042391	0.038991	19/2203 0.8%	58/12384 0.4%
48455	stamen formation	0.0042593	0.038993	15/2203 0.6%	42/12384 0.3%
80117	secondary growth	0.004286	0.038993	4/2203 0.1%	5/12384 0.0%
2524	hypersensitivity	0.004286	0.038993	4/2203 0.1%	5/12384 0.0%
34756	regulation of iron ion transport	0.004286	0.038993	4/2203 0.1%	5/12384 0.0%
16068	type I hypersensitivity	0.004286	0.038993	4/2203 0.1%	5/12384 0.0%
71732	cellular response to nitric oxide	0.0043781	0.039745	11/2203 0.4%	27/12384 0.2%
45489	pectin biosynthetic process	0.0044982	0.040747	23/2203 1.0%	75/12384 0.6%
9620	response to fungus	0.0046244	0.041799	215/2203 9.7%	1031/12384 8.3%
43201	response to leucine	0.0048552	0.043697	12/2203 0.5%	31/12384 0.2%
8105	asymmetric protein localization	0.0048552	0.043697	12/2203 0.5%	31/12384 0.2%
10540	basipetal auxin transport	0.0052306	0.046974	19/2203 0.8%	59/12384 0.4%
9814	defense response, incompatible interaction	0.0053152	0.047632	235/2203 10.6%	1139/12384 9.1%
8272	sulfate transport	0.0053898	0.04813	10/2203 0.4%	24/12384 0.1%
42592	homeostatic process	0.0053937	0.04813	200/2203 9.0%	956/12384 7.7%
48655	tapetal layer morphogenesis	0.0054847	0.04869	15/2203 0.6%	43/12384 0.3%
48654	anther morphogenesis	0.0054847	0.04869	15/2203 0.6%	43/12384 0.3%
10431	seed maturation	0.0054935	0.04869	70/2203 3.1%	295/12384 2.3%
10093	specification of floral organ identity	0.005503	0.04869	16/2203 0.7%	47/12384 0.3%
42549	photosystem II stabilization	0.0056231	0.049542	3/2203 0.1%	3/12384 0.0%
42372	phylloquinone biosynthetic process	0.0056231	0.049542	3/2203 0.1%	3/12384 0.0%

## Sheet: Down_molecular_function
GO-ID	Description	p-val	adj p-val	cluster freq	total freq
4553	hydrolase activity, hydrolyzing O-glycosyl compounds	4.0875e-19	5.1708e-16	120/2105 5.7%	309/11924 2.5%
16798	hydrolase activity, acting on glycosyl bonds	6.2791e-19	5.1708e-16	130/2105 6.1%	348/11924 2.9%
46906	tetrapyrrole binding	3.929e-12	2.157e-09	104/2105 4.9%	308/11924 2.5%
15925	galactosidase activity	6.5353e-10	2.6909e-07	33/2105 1.5%	64/11924 0.5%
16491	oxidoreductase activity	7.0806e-09	2.3323e-06	395/2105 18.7%	1749/11924 14.6%
16627	oxidoreductase activity, acting on the CH-CH group of donors	8.9773e-09	2.4643e-06	128/2105 6.0%	453/11924 3.7%
20037	heme binding	1.1276e-08	2.6531e-06	90/2105 4.2%	289/11924 2.4%
16628	oxidoreductase activity, acting on the CH-CH group of donors, NAD or NADP as acceptor	4.4202e-08	9.1e-06	113/2105 5.3%	397/11924 3.3%
4497	monooxygenase activity	6.8973e-08	1.2622e-05	82/2105 3.8%	265/11924 2.2%
16168	chlorophyll binding	1.3113e-07	2.1598e-05	14/2105 0.6%	19/11924 0.1%
5506	iron ion binding	5.1994e-07	7.1611e-05	124/2105 5.8%	465/11924 3.8%
5372	water transmembrane transporter activity	5.6524e-07	7.1611e-05	15/2105 0.7%	23/11924 0.1%
15250	water channel activity	5.6524e-07	7.1611e-05	15/2105 0.7%	23/11924 0.1%
8810	cellulase activity	7.4622e-07	8.7787e-05	16/2105 0.7%	26/11924 0.2%
30599	pectinesterase activity	1.3822e-06	0.00015177	23/2105 1.0%	48/11924 0.4%
16837	carbon-oxygen lyase activity, acting on polysaccharides	2.2852e-06	0.00023524	12/2105 0.5%	17/11924 0.1%
4557	alpha-galactosidase activity	3.0965e-06	0.0002878	19/2105 0.9%	37/11924 0.3%
19863	IgE binding	3.4382e-06	0.0002878	11/2105 0.5%	15/11924 0.1%
19865	immunoglobulin binding	3.4382e-06	0.0002878	11/2105 0.5%	15/11924 0.1%
4650	polygalacturonase activity	3.5106e-06	0.0002878	13/2105 0.6%	20/11924 0.1%
16709	oxidoreductase activity, acting on paired donors, with incorporation or reduction of molecular oxygen, NADH or NADPH as one donor, and incorporation of one atom of oxygen	3.6695e-06	0.0002878	49/2105 2.3%	148/11924 1.2%
32440	2-alkenal reductase activity	4.8647e-06	0.00036419	88/2105 4.1%	318/11924 2.6%
3700	transcription factor activity	6.4198e-06	0.00045972	180/2105 8.5%	757/11924 6.3%
9055	electron carrier activity	1.4297e-05	0.00097225	86/2105 4.0%	317/11924 2.6%
16705	oxidoreductase activity, acting on paired donors, with incorporation or reduction of molecular oxygen	1.4758e-05	0.00097225	102/2105 4.8%	391/11924 3.2%
51739	ammonia transmembrane transporter activity	3.0091e-05	0.0018355	6/2105 0.2%	6/11924 0.0%
15200	methylammonium transmembrane transporter activity	3.0091e-05	0.0018355	6/2105 0.2%	6/11924 0.0%
4565	beta-galactosidase activity	3.1418e-05	0.0018481	14/2105 0.6%	26/11924 0.2%
4714	transmembrane receptor protein tyrosine kinase activity	3.7248e-05	0.0021116	37/2105 1.7%	110/11924 0.9%
42802	identical protein binding	3.8463e-05	0.0021116	132/2105 6.2%	543/11924 4.5%
4713	protein tyrosine kinase activity	5.7921e-05	0.0030773	72/2105 3.4%	264/11924 2.2%
19199	transmembrane receptor protein kinase activity	7.4303e-05	0.0038243	50/2105 2.3%	168/11924 1.4%
15204	urea transmembrane transporter activity	9.2528e-05	0.004618	8/2105 0.3%	11/11924 0.0%
30570	pectate lyase activity	0.0001366	0.0065569	7/2105 0.3%	9/11924 0.0%
15928	fucosidase activity	0.00013934	0.0065569	9/2105 0.4%	14/11924 0.1%
8422	beta-glucosidase activity	0.00015897	0.0072729	23/2105 1.0%	61/11924 0.5%
4709	MAP kinase kinase kinase activity	0.0001697	0.0075539	44/2105 2.0%	147/11924 1.2%
16829	lyase activity	0.00022404	0.0097104	115/2105 5.4%	480/11924 4.0%
5200	structural constituent of cytoskeleton	0.0003128	0.013027	11/2105 0.5%	21/11924 0.1%
16762	xyloglucan:xyloglucosyl transferase activity	0.00031638	0.013027	10/2105 0.4%	18/11924 0.1%
45330	aspartyl esterase activity	0.00047359	0.016145	12/2105 0.5%	25/11924 0.2%
46983	protein dimerization activity	0.00051008	0.016145	142/2105 6.7%	624/11924 5.2%
4560	alpha-L-fucosidase activity	0.00051514	0.016145	8/2105 0.3%	13/11924 0.1%
47911	galacturan 1,4-alpha-galacturonidase activity	0.00051514	0.016145	8/2105 0.3%	13/11924 0.1%
45544	gibberellin 20-oxidase activity	0.00051514	0.016145	8/2105 0.3%	13/11924 0.1%
15144	carbohydrate transmembrane transporter activity	0.00052673	0.016145	31/2105 1.4%	98/11924 0.8%
47782	coniferin beta-glucosidase activity	0.00060775	0.016145	6/2105 0.2%	8/11924 0.0%
47894	flavonol 3-sulfotransferase activity	0.00060775	0.016145	6/2105 0.2%	8/11924 0.0%
4304	estrone sulfotransferase activity	0.00060775	0.016145	6/2105 0.2%	8/11924 0.0%
47364	desulfoglucosinolate sulfotransferase activity	0.00060775	0.016145	6/2105 0.2%	8/11924 0.0%
47366	quercetin-3-sulfate 4'-sulfotransferase activity	0.00060775	0.016145	6/2105 0.2%	8/11924 0.0%
80131	hydroxyjasmonate sulfotransferase activity	0.00060775	0.016145	6/2105 0.2%	8/11924 0.0%
80118	brassinosteroid sulfotransferase activity	0.00060775	0.016145	6/2105 0.2%	8/11924 0.0%
80071	indol-3-yl-methyl-desulfoglucosinolate sulfotransferase activity	0.00060775	0.016145	6/2105 0.2%	8/11924 0.0%
80070	8-methylthiooctyl-desulfoglucosinolate sulfotransferase activity	0.00060775	0.016145	6/2105 0.2%	8/11924 0.0%
80069	7-methylthioheptyl-desulfoglucosinolate sulfotransferase activity	0.00060775	0.016145	6/2105 0.2%	8/11924 0.0%
80068	5-methylthiopentyl-desulfoglucosinolate sulfotransferase activity	0.00060775	0.016145	6/2105 0.2%	8/11924 0.0%
80067	4-methylthiobutyl-desulfoglucosinolate sulfotransferase activity	0.00060775	0.016145	6/2105 0.2%	8/11924 0.0%
80066	3-methylthiopropyl-desulfoglucosinolate sulfotransferase activity	0.00060775	0.016145	6/2105 0.2%	8/11924 0.0%
50294	steroid sulfotransferase activity	0.00060775	0.016145	6/2105 0.2%	8/11924 0.0%
33946	xyloglucan-specific endo-beta-1,4-glucanase activity	0.00060775	0.016145	6/2105 0.2%	8/11924 0.0%
4027	alcohol sulfotransferase activity	0.00060775	0.016145	6/2105 0.2%	8/11924 0.0%
4871	signal transducer activity	0.00068216	0.017555	125/2105 5.9%	543/11924 4.5%
60089	molecular transducer activity	0.00068216	0.017555	125/2105 5.9%	543/11924 4.5%
19156	isoamylase activity	0.00087426	0.022152	5/2105 0.2%	6/11924 0.0%
15926	glucosidase activity	0.00093823	0.023128	25/2105 1.1%	76/11924 0.6%
16298	lipase activity	0.00095255	0.023128	53/2105 2.5%	199/11924 1.6%
30766	11-O-demethyl-17-O-deacetylvindoline O-methyltransferase activity	0.00096895	0.023128	4/2105 0.1%	4/11924 0.0%
3844	1,4-alpha-glucan branching enzyme activity	0.00096895	0.023128	4/2105 0.1%	4/11924 0.0%
9044	xylan 1,4-beta-xylosidase activity	0.0010156	0.023896	9/2105 0.4%	17/11924 0.1%
30528	transcription regulator activity	0.0011231	0.025483	191/2105 9.0%	886/11924 7.4%
15267	channel activity	0.0011295	0.025483	54/2105 2.5%	205/11924 1.7%
22803	passive transmembrane transporter activity	0.0011295	0.025483	54/2105 2.5%	205/11924 1.7%
4252	serine-type endopeptidase activity	0.0012774	0.028432	28/2105 1.3%	90/11924 0.7%
16707	gibberellin 3-beta-dioxygenase activity	0.0013188	0.028961	11/2105 0.5%	24/11924 0.2%
4872	receptor activity	0.001412	0.0306	77/2105 3.6%	316/11924 2.6%
22838	substrate-specific channel activity	0.0014823	0.031706	52/2105 2.4%	198/11924 1.6%
15112	nitrate transmembrane transporter activity	0.0015491	0.03271	14/2105 0.6%	35/11924 0.2%
16758	transferase activity, transferring hexosyl groups	0.0016304	0.033991	89/2105 4.2%	376/11924 3.1%
16682	oxidoreductase activity, acting on diphenols and related substances as donors, oxygen as acceptor	0.0016778	0.034541	26/2105 1.2%	83/11924 0.6%
47998	hyoscyamine (6S)-dioxygenase activity	0.0018281	0.036718	7/2105 0.3%	12/11924 0.1%
8447	L-ascorbate oxidase activity	0.0018281	0.036718	7/2105 0.3%	12/11924 0.1%
33612	receptor serine/threonine kinase binding	0.0019019	0.037585	22/2105 1.0%	67/11924 0.5%
42936	dipeptide transporter activity	0.0019169	0.037585	13/2105 0.6%	32/11924 0.2%

## Sheet: Down_cellular_component
GO-ID	Description	p-val	adj p-val	cluster freq	total freq
9505	plant-type cell wall	5.5756e-39	3.2171e-36	221/2056 10.7%	535/11539 4.6%
5576	extracellular region	3.202e-38	9.2379e-36	358/2056 17.4%	1076/11539 9.3%
30312	external encapsulating structure	5.5512e-33	1.0677e-30	333/2056 16.1%	1026/11539 8.8%
5618	cell wall	3.7647e-32	5.4306e-30	318/2056 15.4%	972/11539 8.4%
48046	apoplast	2.6419e-22	3.0487e-20	207/2056 10.0%	617/11539 5.3%
31224	intrinsic to membrane	4.5534e-17	4.3789e-15	679/2056 33.0%	2953/11539 25.5%
9521	photosystem	8.0259e-17	6.6157e-15	35/2056 1.7%	48/11539 0.4%
44459	plasma membrane part	3.6829e-16	2.6563e-14	448/2056 21.7%	1811/11539 15.6%
44425	membrane part	4.3582e-16	2.7941e-14	898/2056 43.6%	4138/11539 35.8%
31225	anchored to membrane	4.1546e-15	2.3972e-13	74/2056 3.5%	170/11539 1.4%
5886	plasma membrane	5.3988e-14	2.8319e-12	859/2056 41.7%	3994/11539 34.6%
16020	membrane	6.4285e-14	3.091e-12	1239/2056 60.2%	6101/11539 52.8%
48196	middle lamella-containing extracellular matrix	1.1983e-13	5.3186e-12	26/2056 1.2%	34/11539 0.2%
5911	cell-cell junction	8.5942e-13	3.542e-11	341/2056 16.5%	1365/11539 11.8%
9506	plasmodesma	1.0933e-12	3.9426e-11	337/2056 16.3%	1348/11539 11.6%
55044	symplast	1.0933e-12	3.9426e-11	337/2056 16.3%	1348/11539 11.6%
9523	photosystem II	2.2391e-12	7.5997e-11	24/2056 1.1%	32/11539 0.2%
16021	integral to membrane	6.9037e-12	2.213e-10	620/2056 30.1%	2796/11539 24.2%
30054	cell junction	7.5574e-12	2.2951e-10	344/2056 16.7%	1401/11539 12.1%
9522	photosystem I	9.5348e-12	2.7508e-10	23/2056 1.1%	31/11539 0.2%
46658	anchored to plasma membrane	1.2802e-11	3.5174e-10	49/2056 2.3%	106/11539 0.9%
9579	thylakoid	2.3774e-11	6.2353e-10	139/2056 6.7%	460/11539 3.9%
44436	thylakoid part	2.8928e-11	7.2572e-10	109/2056 5.3%	335/11539 2.9%
31012	extracellular matrix	8.4818e-11	2.0392e-09	44/2056 2.1%	94/11539 0.8%
9897	external side of plasma membrane	1.2607e-10	2.9097e-09	30/2056 1.4%	52/11539 0.4%
9543	chloroplast thylakoid lumen	1.8597e-10	3.9744e-09	25/2056 1.2%	39/11539 0.3%
31978	plastid thylakoid lumen	1.8597e-10	3.9744e-09	25/2056 1.2%	39/11539 0.3%
5773	vacuole	4.4848e-10	9.2419e-09	424/2056 20.6%	1845/11539 15.9%
34357	photosynthetic membrane	4.9389e-10	9.8267e-09	100/2056 4.8%	312/11539 2.7%
9534	chloroplast thylakoid	9.3728e-10	1.7446e-08	113/2056 5.4%	370/11539 3.2%
31976	plastid thylakoid	9.3728e-10	1.7446e-08	113/2056 5.4%	370/11539 3.2%
42651	thylakoid membrane	2.7204e-09	4.9052e-08	95/2056 4.6%	300/11539 2.5%
31977	thylakoid lumen	4.0799e-09	7.0112e-08	32/2056 1.5%	64/11539 0.5%
55035	plastid thylakoid membrane	4.2529e-09	7.0112e-08	93/2056 4.5%	294/11539 2.5%
9535	chloroplast thylakoid membrane	4.2529e-09	7.0112e-08	93/2056 4.5%	294/11539 2.5%
31984	organelle subcompartment	7.555e-09	1.2109e-07	123/2056 5.9%	426/11539 3.6%
44434	chloroplast part	1.1462e-08	1.7874e-07	300/2056 14.5%	1265/11539 10.9%
31226	intrinsic to plasma membrane	3.1533e-08	4.7881e-07	97/2056 4.7%	322/11539 2.7%
9986	cell surface	2.955e-07	4.3718e-06	50/2056 2.4%	140/11539 1.2%
44435	plastid part	8.3958e-07	1.2111e-05	305/2056 14.8%	1345/11539 11.6%
44420	extracellular matrix part	1.1572e-06	1.6286e-05	21/2056 1.0%	41/11539 0.3%
9526	plastid envelope	3.6352e-06	4.8961e-05	180/2056 8.7%	744/11539 6.4%
9941	chloroplast envelope	3.6488e-06	4.8961e-05	174/2056 8.4%	715/11539 6.1%
45298	tubulin complex	5.3487e-06	7.014e-05	10/2056 0.4%	13/11539 0.1%
48226	Casparian strip	7.6136e-06	9.5501e-05	8/2056 0.3%	9/11539 0.0%
9531	secondary cell wall	7.6136e-06	9.5501e-05	8/2056 0.3%	9/11539 0.0%
326	protein storage vacuole	1.4445e-05	0.00017734	12/2056 0.5%	19/11539 0.1%
9843	cyanelle thylakoid	3.1807e-05	0.00038235	6/2056 0.2%	6/11539 0.0%
30076	light-harvesting complex	3.8198e-05	0.0004498	7/2056 0.3%	8/11539 0.0%
10287	plastoglobule	4.3698e-05	0.00050428	27/2056 1.3%	71/11539 0.6%
44421	extracellular region part	4.7704e-05	0.00053971	81/2056 3.9%	301/11539 2.6%
9570	chloroplast stroma	7.1921e-05	0.00079805	157/2056 7.6%	667/11539 5.7%
9532	plastid stroma	8.593e-05	0.00093551	160/2056 7.7%	684/11539 5.9%
42807	central vacuole	0.00014524	0.0015519	7/2056 0.3%	9/11539 0.0%
33115	cyanelle thylakoid membrane	0.00017887	0.001843	5/2056 0.2%	5/11539 0.0%
9538	photosystem I reaction center	0.00017887	0.001843	5/2056 0.2%	5/11539 0.0%
44426	cell wall part	0.00019114	0.0019349	12/2056 0.5%	23/11539 0.1%
43674	columella	0.00025074	0.0024521	8/2056 0.3%	12/11539 0.1%
43673	sexine	0.00025074	0.0024521	8/2056 0.3%	12/11539 0.1%
44462	external encapsulating structure part	0.0002716	0.0026119	26/2056 1.2%	74/11539 0.6%
44437	vacuolar part	0.00049552	0.0046872	225/2056 10.9%	1038/11539 8.9%
9501	amyloplast	0.00060743	0.005653	10/2056 0.4%	19/11539 0.1%
5774	vacuolar membrane	0.00064874	0.0059417	219/2056 10.6%	1012/11539 8.7%
30075	plasma membrane-derived thylakoid	0.00091418	0.0082419	5/2056 0.2%	6/11539 0.0%
9783	photosystem II antenna complex	0.0010055	0.0089257	4/2056 0.1%	4/11539 0.0%
9842	cyanelle	0.0010219	0.0089337	10/2056 0.4%	20/11539 0.1%
43668	exine	0.0019599	0.01663	8/2056 0.3%	15/11539 0.1%
43667	pollen wall	0.0019599	0.01663	8/2056 0.3%	15/11539 0.1%
9536	plastid	0.0025043	0.020941	579/2056 28.1%	2962/11539 25.6%
10319	stromule	0.0027061	0.022306	21/2056 1.0%	64/11539 0.5%
10168	ER body	0.003549	0.028842	7/2056 0.3%	13/11539 0.1%
9782	photosystem I antenna complex	0.004312	0.033622	4/2056 0.1%	5/11539 0.0%
9503	thylakoid light-harvesting complex	0.004312	0.033622	4/2056 0.1%	5/11539 0.0%
9517	PSII associated light-harvesting complex II	0.004312	0.033622	4/2056 0.1%	5/11539 0.0%
70505	pollen coat	0.0056499	0.039756	3/2056 0.1%	3/11539 0.0%
10170	glucose-1-phosphate adenylyltransferase complex	0.0056499	0.039756	3/2056 0.1%	3/11539 0.0%
30094	plasma membrane-derived photosystem I	0.0056499	0.039756	3/2056 0.1%	3/11539 0.0%
10368	chloroplast isoamylase complex	0.0056499	0.039756	3/2056 0.1%	3/11539 0.0%
9512	cytochrome b6f complex	0.0056499	0.039756	3/2056 0.1%	3/11539 0.0%
30931	heterotetrameric ADPG pyrophosphorylase complex	0.0056499	0.039756	3/2056 0.1%	3/11539 0.0%
30929	ADPG pyrophosphorylase complex	0.0056499	0.039756	3/2056 0.1%	3/11539 0.0%
43033	isoamylase complex	0.0056499	0.039756	3/2056 0.1%	3/11539 0.0%
9507	chloroplast	0.0061785	0.042636	530/2056 25.7%	2725/11539 23.6%
9654	oxygen evolving complex	0.006207	0.042636	5/2056 0.2%	8/11539 0.0%
325	plant-type vacuole	0.0064244	0.043611	66/2056 3.2%	277/11539 2.4%

## Sheet: Up_biological_process
GO-ID	Description	p-val	adj p-val	cluster freq	total freq
9607	response to biotic stimulus	5.436e-68	2.3913e-64	732/1913 38.2%	2754/12384 22.2%
9719	response to endogenous stimulus	1.9143e-64	4.2105e-61	738/1913 38.5%	2833/12384 22.8%
42221	response to chemical stimulus	4.6279e-63	6.7861e-60	1115/1913 58.2%	5056/12384 40.8%
9620	response to fungus	1.1162e-62	1.2276e-59	366/1913 19.1%	1031/12384 8.3%
10243	response to organic nitrogen	1.8838e-61	1.6573e-58	373/1913 19.4%	1071/12384 8.6%
10033	response to organic substance	4.8632e-59	3.5656e-56	902/1913 47.1%	3835/12384 30.9%
51707	response to other organism	1.1569e-58	7.2704e-56	637/1913 33.2%	2373/12384 19.1%
10200	response to chitin	1.3888e-58	7.6369e-56	311/1913 16.2%	831/12384 6.7%
14070	response to organic cyclic substance	3.8119e-57	1.8632e-54	492/1913 25.7%	1660/12384 13.4%
9751	response to salicylic acid stimulus	6.2503e-57	2.7495e-54	335/1913 17.5%	944/12384 7.6%
9753	response to jasmonic acid stimulus	8.8056e-57	3.5214e-54	338/1913 17.6%	958/12384 7.7%
45088	regulation of innate immune response	2.9273e-56	1.0731e-53	347/1913 18.1%	1001/12384 8.0%
9863	salicylic acid mediated signaling pathway	1.7225e-54	5.8287e-52	286/1913 14.9%	758/12384 6.1%
10363	regulation of plant-type hypersensitive response	3.7626e-54	1.1823e-51	323/1913 16.8%	915/12384 7.3%
71446	cellular response to salicylic acid stimulus	8.0785e-54	2.3691e-51	288/1913 15.0%	771/12384 6.2%
6952	defense response	9.7788e-54	2.6886e-51	636/1913 33.2%	2434/12384 19.6%
9814	defense response, incompatible interaction	4.0481e-53	1.0475e-50	372/1913 19.4%	1139/12384 9.1%
50776	regulation of immune response	6.2737e-53	1.5332e-50	351/1913 18.3%	1047/12384 8.4%
2682	regulation of immune system process	3.9284e-51	9.0953e-49	355/1913 18.5%	1081/12384 8.7%
9725	response to hormone stimulus	2.0302e-49	4.4655e-47	634/1913 33.1%	2485/12384 20.0%
9627	systemic acquired resistance	5.7989e-49	1.2147e-46	316/1913 16.5%	928/12384 7.4%
44283	small molecule biosynthetic process	1.1322e-48	2.2638e-46	732/1913 38.2%	3033/12384 24.4%
80135	regulation of cellular response to stress	4.0671e-48	7.7788e-46	332/1913 17.3%	1006/12384 8.1%
31347	regulation of defense response	3.5015e-47	6.418e-45	393/1913 20.5%	1295/12384 10.4%
6955	immune response	4.3949e-47	7.7332e-45	471/1913 24.6%	1674/12384 13.5%
50832	defense response to fungus	5.5858e-46	9.4507e-44	280/1913 14.6%	798/12384 6.4%
6575	cellular amino acid derivative metabolic process	1.0575e-45	1.723e-43	379/1913 19.8%	1245/12384 10.0%
9617	response to bacterium	1.2158e-45	1.9101e-43	392/1913 20.4%	1307/12384 10.5%
9611	response to wounding	2.2574e-45	3.4243e-43	293/1913 15.3%	859/12384 6.9%
19748	secondary metabolic process	1.1836e-44	1.7356e-42	449/1913 23.4%	1595/12384 12.8%
9867	jasmonic acid mediated signaling pathway	1.5298e-44	2.1709e-42	230/1913 12.0%	602/12384 4.8%
71395	cellular response to jasmonic acid stimulus	2.1096e-44	2.9001e-42	231/1913 12.0%	607/12384 4.9%
42398	cellular amino acid derivative biosynthetic process	3.6904e-44	4.9194e-42	304/1913 15.8%	918/12384 7.4%
9743	response to carbohydrate stimulus	1.0179e-43	1.3169e-41	428/1913 22.3%	1503/12384 12.1%
80134	regulation of response to stress	2.0049e-43	2.5199e-41	408/1913 21.3%	1409/12384 11.3%
6612	protein targeting to membrane	2.1773e-43	2.6605e-41	335/1913 17.5%	1065/12384 8.5%
45087	innate immune response	6.8258e-43	8.1153e-41	430/1913 22.4%	1523/12384 12.2%
50896	response to stimulus	1.7907e-42	2.0729e-40	1381/1913 72.1%	7224/12384 58.3%
51704	multi-organism process	5.931e-42	6.6899e-40	725/1913 37.8%	3108/12384 25.0%
2376	immune system process	2.0971e-39	2.3063e-37	482/1913 25.1%	1832/12384 14.7%
9862	systemic acquired resistance, salicylic acid mediated signaling pathway	1.8065e-38	1.9383e-36	191/1913 9.9%	489/12384 3.9%
6082	organic acid metabolic process	2.0969e-38	2.1962e-36	691/1913 36.1%	2980/12384 24.0%
70887	cellular response to chemical stimulus	2.7202e-38	2.7828e-36	648/1913 33.8%	2741/12384 22.1%
42180	cellular ketone metabolic process	3.0655e-38	3.0648e-36	694/1913 36.2%	3000/12384 24.2%
6950	response to stress	6.7099e-38	6.5593e-36	1086/1913 56.7%	5366/12384 43.3%
42742	defense response to bacterium	7.3518e-38	7.0306e-36	322/1913 16.8%	1063/12384 8.5%
43436	oxoacid metabolic process	1.2358e-37	1.1567e-35	686/1913 35.8%	2966/12384 23.9%
71407	cellular response to organic cyclic substance	1.0489e-36	9.6129e-35	315/1913 16.4%	1043/12384 8.4%
34976	response to endoplasmic reticulum stress	4.2432e-36	3.8093e-34	235/1913 12.2%	689/12384 5.5%
6811	ion transport	6.5725e-36	5.7825e-34	482/1913 25.1%	1884/12384 15.2%
19752	carboxylic acid metabolic process	2.4856e-35	2.144e-33	667/1913 34.8%	2902/12384 23.4%
43067	regulation of programmed cell death	9.7265e-35	8.0386e-33	351/1913 18.3%	1238/12384 9.9%
10035	response to inorganic substance	9.77e-35	8.0386e-33	559/1913 29.2%	2314/12384 18.6%
71310	cellular response to organic substance	9.8678e-35	8.0386e-33	547/1913 28.5%	2249/12384 18.1%
6820	anion transport	3.0268e-34	2.4209e-32	333/1913 17.4%	1157/12384 9.3%
71466	cellular response to xenobiotic stimulus	5.0815e-34	3.9216e-32	221/1913 11.5%	647/12384 5.2%
6805	xenobiotic metabolic process	5.0815e-34	3.9216e-32	221/1913 11.5%	647/12384 5.2%
10941	regulation of cell death	5.2915e-34	4.0133e-32	354/1913 18.5%	1262/12384 10.1%
71705	nitrogen compound transport	6.6939e-34	4.991e-32	373/1913 19.4%	1357/12384 10.9%
2679	respiratory burst involved in defense response	1.6868e-33	1.2367e-31	125/1913 6.5%	272/12384 2.1%
9723	response to ethylene stimulus	2.0198e-33	1.4566e-31	229/1913 11.9%	687/12384 5.5%
45730	respiratory burst	6.5301e-33	4.6332e-31	125/1913 6.5%	275/12384 2.2%
6519	cellular amino acid and derivative metabolic process	4.5974e-32	3.2101e-30	480/1913 25.0%	1935/12384 15.6%
16053	organic acid biosynthetic process	1.0344e-31	7.0003e-30	456/1913 23.8%	1814/12384 14.6%
46394	carboxylic acid biosynthetic process	1.0344e-31	7.0003e-30	456/1913 23.8%	1814/12384 14.6%
48583	regulation of response to stimulus	1.3014e-31	8.6738e-30	475/1913 24.8%	1916/12384 15.4%
71495	cellular response to endogenous stimulus	3.7108e-31	2.4364e-29	407/1913 21.2%	1568/12384 12.6%
165	MAPKKK cascade	4.6474e-31	3.0065e-29	213/1913 11.1%	639/12384 5.1%
9755	hormone-mediated signaling pathway	5.2451e-31	3.3439e-29	368/1913 19.2%	1372/12384 11.0%
23034	intracellular signaling pathway	7.1081e-31	4.4669e-29	397/1913 20.7%	1521/12384 12.2%
9698	phenylpropanoid metabolic process	1.4785e-30	9.1606e-29	226/1913 11.8%	701/12384 5.6%
43069	negative regulation of programmed cell death	1.6526e-30	1.0001e-28	204/1913 10.6%	605/12384 4.8%
31348	negative regulation of defense response	1.6597e-30	1.0001e-28	207/1913 10.8%	618/12384 4.9%
23014	signal transmission via phosphorylation event	2.1551e-30	1.2811e-28	229/1913 11.9%	716/12384 5.7%
10310	regulation of hydrogen peroxide metabolic process	2.1962e-30	1.2882e-28	152/1913 7.9%	391/12384 3.1%
31407	oxylipin metabolic process	3.7992e-30	2.199e-28	128/1913 6.6%	301/12384 2.4%
42537	benzene and derivative metabolic process	4.5322e-30	2.5893e-28	201/1913 10.5%	596/12384 4.8%
80010	regulation of oxygen and reactive oxygen species metabolic process	5.9419e-30	3.3154e-28	152/1913 7.9%	394/12384 3.1%
7243	intracellular protein kinase cascade	5.954e-30	3.3154e-28	217/1913 11.3%	667/12384 5.3%
32870	cellular response to hormone stimulus	6.6531e-30	3.6584e-28	391/1913 20.4%	1505/12384 12.1%
6810	transport	1.1773e-29	6.3938e-28	906/1913 47.3%	4437/12384 35.8%
60548	negative regulation of cell death	1.2151e-29	6.5184e-28	207/1913 10.8%	626/12384 5.0%
32787	monocarboxylic acid metabolic process	3.8534e-29	2.0423e-27	530/1913 27.7%	2257/12384 18.2%
9699	phenylpropanoid biosynthetic process	7.1606e-29	3.75e-27	192/1913 10.0%	568/12384 4.5%
9694	jasmonic acid metabolic process	8.3023e-29	4.2967e-27	121/1913 6.3%	283/12384 2.2%
46942	carboxylic acid transport	9.489e-29	4.7979e-27	233/1913 12.1%	751/12384 6.0%
15849	organic acid transport	9.489e-29	4.7979e-27	233/1913 12.1%	751/12384 6.0%
9410	response to xenobiotic stimulus	1.7157e-28	8.5764e-27	228/1913 11.9%	731/12384 5.9%
15711	organic anion transport	3.0235e-28	1.4944e-26	244/1913 12.7%	807/12384 6.5%
6865	amino acid transport	3.2578e-28	1.5923e-26	210/1913 10.9%	653/12384 5.2%
30968	endoplasmic reticulum unfolded protein response	4.4344e-28	2.1436e-26	138/1913 7.2%	352/12384 2.8%
71702	organic substance transport	1.0515e-27	5.0279e-26	615/1913 32.1%	2761/12384 22.2%
15837	amine transport	1.8389e-27	8.6983e-26	213/1913 11.1%	674/12384 5.4%
34620	cellular response to unfolded protein	2.3594e-27	1.1041e-25	138/1913 7.2%	357/12384 2.8%
51179	localization	2.652e-27	1.228e-25	946/1913 49.4%	4744/12384 38.3%
6984	ER-nucleus signaling pathway	3.4472e-27	1.5796e-25	142/1913 7.4%	374/12384 3.0%
9696	salicylic acid metabolic process	3.7867e-27	1.7173e-25	173/1913 9.0%	502/12384 4.0%
6812	cation transport	6.1342e-27	2.7535e-25	368/1913 19.2%	1433/12384 11.5%
71445	cellular response to protein stimulus	1.6544e-26	7.3513e-25	138/1913 7.2%	363/12384 2.9%
6605	protein targeting	2.3926e-26	1.0525e-24	396/1913 20.7%	1588/12384 12.8%
51234	establishment of localization	3.5761e-26	1.5575e-24	906/1913 47.3%	4526/12384 36.5%
55114	oxidation reduction	4.7055e-26	2.0294e-24	506/1913 26.4%	2185/12384 17.6%
9628	response to abiotic stimulus	1.2627e-25	5.3927e-24	802/1913 41.9%	3906/12384 31.5%
6986	response to unfolded protein	2.0203e-25	8.5454e-24	138/1913 7.2%	371/12384 2.9%
23033	signaling pathway	2.1956e-25	9.1987e-24	591/1913 30.8%	2675/12384 21.6%
35556	intracellular signal transduction	4.3231e-25	1.7941e-23	319/1913 16.6%	1212/12384 9.7%
44281	small molecule metabolic process	9.4821e-25	3.8983e-23	1023/1913 53.4%	5298/12384 42.7%
9692	ethylene metabolic process	1.7544e-24	7.0802e-23	95/1913 4.9%	213/12384 1.7%
9693	ethylene biosynthetic process	1.7544e-24	7.0802e-23	95/1913 4.9%	213/12384 1.7%
43450	alkene biosynthetic process	2.6899e-24	1.066e-22	95/1913 4.9%	214/12384 1.7%
43449	cellular alkene metabolic process	2.6899e-24	1.066e-22	95/1913 4.9%	214/12384 1.7%
71216	cellular response to biotic stimulus	8.8749e-24	3.4858e-22	146/1913 7.6%	417/12384 3.3%
7165	signal transduction	5.6377e-23	2.1947e-21	636/1913 33.2%	2990/12384 24.1%
7154	cell communication	1.1299e-22	4.36e-21	715/1913 37.3%	3462/12384 27.9%
9697	salicylic acid biosynthetic process	1.9391e-22	7.4174e-21	154/1913 8.0%	463/12384 3.7%
23060	signal transmission	2.6113e-22	9.9026e-21	645/1913 33.7%	3059/12384 24.7%
9813	flavonoid biosynthetic process	3.084e-22	1.1595e-20	128/1913 6.6%	355/12384 2.8%
23046	signaling process	3.1342e-22	1.1684e-20	645/1913 33.7%	3061/12384 24.7%
23052	signaling	5.5638e-22	2.0567e-20	654/1913 34.1%	3120/12384 25.1%
9812	flavonoid metabolic process	5.8933e-22	2.1604e-20	133/1913 6.9%	378/12384 3.0%
6979	response to oxidative stress	8.7894e-22	3.1954e-20	280/1913 14.6%	1066/12384 8.6%
9595	detection of biotic stimulus	1.2596e-21	4.5417e-20	114/1913 5.9%	303/12384 2.4%
70727	cellular macromolecule localization	1.7446e-21	6.2395e-20	457/1913 23.8%	2009/12384 16.2%
6886	intracellular protein transport	2.0755e-21	7.3628e-20	416/1913 21.7%	1786/12384 14.4%
31408	oxylipin biosynthetic process	2.2192e-21	7.81e-20	88/1913 4.6%	205/12384 1.6%
10583	response to cyclopentenone	2.3313e-21	8.1391e-20	115/1913 6.0%	309/12384 2.4%
9695	jasmonic acid biosynthetic process	4.5059e-20	1.5607e-18	81/1913 4.2%	187/12384 1.5%
2831	regulation of response to biotic stimulus	6.8558e-20	2.3561e-18	109/1913 5.6%	296/12384 2.3%
9308	amine metabolic process	1.1848e-19	4.0402e-18	381/1913 19.9%	1632/12384 13.1%
48585	negative regulation of response to stimulus	2.0068e-19	6.7907e-18	238/1913 12.4%	892/12384 7.2%
2252	immune effector process	3.0007e-19	1.0076e-17	154/1913 8.0%	495/12384 3.9%
34613	cellular protein localization	4.714e-19	1.571e-17	432/1913 22.5%	1924/12384 15.5%
15698	inorganic anion transport	1.3727e-18	4.5401e-17	190/1913 9.9%	670/12384 5.4%
51641	cellular localization	4.8275e-18	1.5848e-16	562/1913 29.3%	2687/12384 21.6%
15031	protein transport	7.2853e-18	2.3739e-16	428/1913 22.3%	1929/12384 15.5%
46907	intracellular transport	1.225e-17	3.9625e-16	489/1913 25.5%	2278/12384 18.3%
9651	response to salt stress	1.2776e-17	4.1024e-16	333/1913 17.4%	1415/12384 11.4%
45184	establishment of protein localization	1.3682e-17	4.3586e-16	429/1913 22.4%	1941/12384 15.6%
51789	response to protein stimulus	1.3772e-17	4.3586e-16	167/1913 8.7%	574/12384 4.6%
9404	toxin metabolic process	2.5857e-17	8.1245e-16	119/1913 6.2%	360/12384 2.9%
33993	response to lipid	3.5044e-17	1.0933e-15	346/1913 18.0%	1494/12384 12.0%
9407	toxin catabolic process	3.5609e-17	1.1031e-15	118/1913 6.1%	357/12384 2.8%
51649	establishment of localization in cell	4.6519e-17	1.431e-15	527/1913 27.5%	2511/12384 20.2%
51716	cellular response to stimulus	1.1185e-16	3.4167e-15	851/1913 44.4%	4468/12384 36.0%
6970	response to osmotic stress	1.7596e-16	5.3382e-15	346/1913 18.0%	1509/12384 12.1%
10167	response to nitrate	1.8941e-16	5.7068e-15	139/1913 7.2%	458/12384 3.6%
44106	cellular amine metabolic process	2.8131e-16	8.4183e-15	338/1913 17.6%	1470/12384 11.8%
70482	response to oxygen levels	3.7325e-16	1.1094e-14	88/1913 4.6%	240/12384 1.9%
42445	hormone metabolic process	4.6845e-16	1.383e-14	183/1913 9.5%	671/12384 5.4%
15706	nitrate transport	5.318e-16	1.5596e-14	137/1913 7.1%	454/12384 3.6%
15804	neutral amino acid transport	5.6084e-16	1.6339e-14	94/1913 4.9%	266/12384 2.1%
6520	cellular amino acid metabolic process	5.6579e-16	1.6374e-14	322/1913 16.8%	1390/12384 11.2%
15824	proline transport	2.1693e-15	6.2371e-14	87/1913 4.5%	242/12384 1.9%
1666	response to hypoxia	3.101e-15	8.858e-14	84/1913 4.3%	231/12384 1.8%
6790	sulfur metabolic process	7.0992e-15	2.0148e-13	267/1913 13.9%	1119/12384 9.0%
8104	protein localization	1.0255e-14	2.8918e-13	442/1913 23.1%	2087/12384 16.8%
46283	anthocyanin metabolic process	2.7349e-14	7.663e-13	74/1913 3.8%	198/12384 1.5%
6944	cellular membrane fusion	3.031e-14	8.4389e-13	138/1913 7.2%	480/12384 3.8%
42430	indole and derivative metabolic process	3.1619e-14	8.6931e-13	104/1913 5.4%	325/12384 2.6%
42434	indole derivative metabolic process	3.1619e-14	8.6931e-13	104/1913 5.4%	325/12384 2.6%
42538	hyperosmotic salinity response	3.7009e-14	1.0112e-12	119/1913 6.2%	393/12384 3.1%
9718	anthocyanin biosynthetic process	4.9797e-14	1.3522e-12	71/1913 3.7%	188/12384 1.5%
61025	membrane fusion	7.3523e-14	1.9842e-12	138/1913 7.2%	485/12384 3.9%
34754	cellular hormone metabolic process	8.433e-14	2.262e-12	117/1913 6.1%	388/12384 3.1%
33036	macromolecule localization	9.5026e-14	2.5335e-12	500/1913 26.1%	2449/12384 19.7%
9737	response to abscisic acid stimulus	2.8256e-13	7.4879e-12	255/1913 13.3%	1088/12384 8.7%
71396	cellular response to lipid	3.1433e-13	8.2799e-12	185/1913 9.6%	725/12384 5.8%
10224	response to UV-B	4.148e-13	1.0861e-11	87/1913 4.5%	262/12384 2.1%
9415	response to water	4.6742e-13	1.2167e-11	204/1913 10.6%	825/12384 6.6%
9414	response to water deprivation	8.0161e-13	2.0743e-11	202/1913 10.5%	819/12384 6.6%
71215	cellular response to abscisic acid stimulus	1.0968e-12	2.8215e-11	133/1913 6.9%	477/12384 3.8%
6631	fatty acid metabolic process	1.1491e-12	2.939e-11	255/1913 13.3%	1101/12384 8.8%
30001	metal ion transport	1.292e-12	3.2852e-11	246/1913 12.8%	1054/12384 8.5%
43455	regulation of secondary metabolic process	1.9289e-12	4.8766e-11	122/1913 6.3%	428/12384 3.4%
9738	abscisic acid mediated signaling pathway	2.0233e-12	5.0859e-11	123/1913 6.4%	433/12384 3.4%
9625	response to insect	4.5213e-12	1.1301e-10	43/1913 2.2%	95/12384 0.7%
42435	indole derivative biosynthetic process	5.5314e-12	1.3747e-10	89/1913 4.6%	282/12384 2.2%
9066	aspartate family amino acid metabolic process	7.3222e-12	1.8096e-10	121/1913 6.3%	431/12384 3.4%
6629	lipid metabolic process	7.4128e-12	1.8217e-10	485/1913 25.3%	2421/12384 19.5%
10023	proanthocyanidin biosynthetic process	7.5404e-12	1.8428e-10	25/1913 1.3%	39/12384 0.3%
41	transition metal ion transport	9.4539e-12	2.2977e-10	148/1913 7.7%	564/12384 4.5%
9850	auxin metabolic process	1.0677e-11	2.5807e-10	91/1913 4.7%	294/12384 2.3%
33554	cellular response to stress	1.2055e-11	2.8977e-10	493/1913 25.7%	2475/12384 19.9%
43900	regulation of multi-organism process	1.3286e-11	3.1764e-10	119/1913 6.2%	425/12384 3.4%
10038	response to metal ion	1.8297e-11	4.3507e-10	264/1913 13.8%	1177/12384 9.5%
10817	regulation of hormone levels	2.3918e-11	5.6567e-10	230/1913 12.0%	996/12384 8.0%
9804	coumarin metabolic process	2.9609e-11	6.9282e-10	57/1913 2.9%	153/12384 1.2%
9805	coumarin biosynthetic process	2.9609e-11	6.9282e-10	57/1913 2.9%	153/12384 1.2%
9636	response to toxin	3.0666e-11	7.1376e-10	80/1913 4.1%	250/12384 2.0%
52542	defense response by callose deposition	3.4498e-11	7.9872e-10	69/1913 3.6%	203/12384 1.6%
51606	detection of stimulus	3.5121e-11	8.0888e-10	124/1913 6.4%	455/12384 3.6%
16137	glycoside metabolic process	5.6339e-11	1.2908e-09	134/1913 7.0%	507/12384 4.0%
6972	hyperosmotic response	5.8857e-11	1.3415e-09	141/1913 7.3%	542/12384 4.3%
9962	regulation of flavonoid biosynthetic process	6.3635e-11	1.4429e-09	101/1913 5.2%	349/12384 2.8%
6555	methionine metabolic process	6.4144e-11	1.447e-09	112/1913 5.8%	401/12384 3.2%
6468	protein amino acid phosphorylation	1.2899e-10	2.895e-09	236/1913 12.3%	1045/12384 8.4%
9816	defense response to bacterium, incompatible interaction	1.3453e-10	3.004e-09	54/1913 2.8%	146/12384 1.1%
9683	indoleacetic acid metabolic process	1.3834e-10	3.0735e-09	78/1913 4.0%	248/12384 2.0%
96	sulfur amino acid metabolic process	1.5039e-10	3.3244e-09	178/1913 9.3%	738/12384 5.9%
31349	positive regulation of defense response	1.7891e-10	3.9352e-09	55/1913 2.8%	151/12384 1.2%
71456	cellular response to hypoxia	1.899e-10	4.1562e-09	38/1913 1.9%	86/12384 0.6%
48544	recognition of pollen	1.9884e-10	4.3301e-09	41/1913 2.1%	97/12384 0.7%
2237	response to molecule of bacterial origin	2.8278e-10	6.1277e-09	70/1913 3.6%	216/12384 1.7%
9875	pollen-pistil interaction	4.2392e-10	9.1413e-09	41/1913 2.1%	99/12384 0.7%
71453	cellular response to oxygen levels	4.3126e-10	9.2543e-09	38/1913 1.9%	88/12384 0.7%
19438	aromatic compound biosynthetic process	5.0621e-10	1.081e-08	566/1913 29.5%	2969/12384 23.9%
45089	positive regulation of innate immune response	5.881e-10	1.2498e-08	53/1913 2.7%	147/12384 1.1%
9072	aromatic amino acid family metabolic process	7.6834e-10	1.625e-08	103/1913 5.3%	373/12384 3.0%
16138	glycoside biosynthetic process	9.4108e-10	1.9808e-08	111/1913 5.8%	413/12384 3.3%
16310	phosphorylation	1.1659e-09	2.4423e-08	325/1913 16.9%	1566/12384 12.6%
9058	biosynthetic process	1.4296e-09	2.9806e-08	1072/1913 56.0%	6164/12384 49.7%
52545	callose localization	1.6656e-09	3.4562e-08	70/1913 3.6%	224/12384 1.8%
46148	pigment biosynthetic process	2.0637e-09	4.2622e-08	114/1913 5.9%	433/12384 3.4%
34285	response to disaccharide stimulus	2.1619e-09	4.4441e-08	100/1913 5.2%	365/12384 2.9%
9744	response to sucrose stimulus	2.8886e-09	5.9103e-08	99/1913 5.1%	362/12384 2.9%
9624	response to nematode	3.0976e-09	6.3085e-08	96/1913 5.0%	348/12384 2.8%
65008	regulation of biological quality	5.0553e-09	1.0248e-07	550/1913 28.7%	2913/12384 23.5%
9684	indoleacetic acid biosynthetic process	5.1985e-09	1.049e-07	71/1913 3.7%	234/12384 1.8%
6633	fatty acid biosynthetic process	5.8892e-09	1.1829e-07	145/1913 7.5%	598/12384 4.8%
50778	positive regulation of immune response	6.6108e-09	1.3219e-07	53/1913 2.7%	156/12384 1.2%
6721	terpenoid metabolic process	8.2696e-09	1.6461e-07	108/1913 5.6%	413/12384 3.3%
71369	cellular response to ethylene stimulus	8.6537e-09	1.7147e-07	84/1913 4.3%	297/12384 2.3%
9851	auxin biosynthetic process	9.4034e-09	1.855e-07	71/1913 3.7%	237/12384 1.9%
33037	polysaccharide localization	1.0499e-08	2.0617e-07	70/1913 3.6%	233/12384 1.8%
43269	regulation of ion transport	1.0998e-08	2.1502e-07	117/1913 6.1%	460/12384 3.7%
8037	cell recognition	1.2643e-08	2.4609e-07	42/1913 2.1%	113/12384 0.9%
9820	alkaloid metabolic process	1.5062e-08	2.9189e-07	47/1913 2.4%	134/12384 1.0%
44255	cellular lipid metabolic process	1.6867e-08	3.2542e-07	395/1913 20.6%	2010/12384 16.2%
6995	cellular response to nitrogen starvation	1.7112e-08	3.2871e-07	41/1913 2.1%	110/12384 0.8%
8610	lipid biosynthetic process	1.9597e-08	3.7481e-07	339/1913 17.7%	1686/12384 13.6%
9873	ethylene mediated signaling pathway	2.4668e-08	4.6976e-07	74/1913 3.8%	256/12384 2.0%
44249	cellular biosynthetic process	2.7326e-08	5.1813e-07	1025/1913 53.5%	5925/12384 47.8%
52544	defense response by callose deposition in cell wall	2.9923e-08	5.6252e-07	43/1913 2.2%	120/12384 0.9%
52482	defense response by cell wall thickening	2.9923e-08	5.6252e-07	43/1913 2.2%	120/12384 0.9%
34220	ion transmembrane transport	3.4808e-08	6.5158e-07	169/1913 8.8%	741/12384 5.9%
9963	positive regulation of flavonoid biosynthetic process	3.5959e-08	6.7026e-07	82/1913 4.2%	296/12384 2.3%
15674	di-, tri-valent inorganic cation transport	3.6663e-08	6.8051e-07	173/1913 9.0%	763/12384 6.1%
2684	positive regulation of immune system process	5.2277e-08	9.6343e-07	54/1913 2.8%	169/12384 1.3%
16054	organic acid catabolic process	5.2563e-08	9.6343e-07	160/1913 8.3%	697/12384 5.6%
46395	carboxylic acid catabolic process	5.2563e-08	9.6343e-07	160/1913 8.3%	697/12384 5.6%
19757	glycosinolate metabolic process	5.6906e-08	1.0302e-06	103/1913 5.3%	402/12384 3.2%
19760	glucosinolate metabolic process	5.6906e-08	1.0302e-06	103/1913 5.3%	402/12384 3.2%
16143	S-glycoside metabolic process	5.6906e-08	1.0302e-06	103/1913 5.3%	402/12384 3.2%
9682	induced systemic resistance	6.0236e-08	1.086e-06	28/1913 1.4%	64/12384 0.5%
6863	purine transport	6.7325e-08	1.2088e-06	51/1913 2.6%	157/12384 1.2%
16114	terpenoid biosynthetic process	7.2098e-08	1.2893e-06	93/1913 4.8%	354/12384 2.8%
51552	flavone metabolic process	7.6851e-08	1.3632e-06	39/1913 2.0%	107/12384 0.8%
51553	flavone biosynthetic process	7.6851e-08	1.3632e-06	39/1913 2.0%	107/12384 0.8%
51554	flavonol metabolic process	7.7679e-08	1.3668e-06	38/1913 1.9%	103/12384 0.8%
51555	flavonol biosynthetic process	7.7679e-08	1.3668e-06	38/1913 1.9%	103/12384 0.8%
43562	cellular response to nitrogen levels	1.0968e-07	1.9223e-06	44/1913 2.3%	129/12384 1.0%
302	response to reactive oxygen species	1.2464e-07	2.1757e-06	158/1913 8.2%	695/12384 5.6%
43648	dicarboxylic acid metabolic process	1.3297e-07	2.3121e-06	51/1913 2.6%	160/12384 1.2%
2218	activation of innate immune response	1.4173e-07	2.4547e-06	37/1913 1.9%	101/12384 0.8%
9817	defense response to fungus, incompatible interaction	1.734e-07	2.9913e-06	40/1913 2.0%	114/12384 0.9%
42440	pigment metabolic process	1.8955e-07	3.2572e-06	132/1913 6.9%	561/12384 4.5%
6766	vitamin metabolic process	2.0751e-07	3.5519e-06	84/1913 4.3%	317/12384 2.5%
43090	amino acid import	2.7014e-07	4.606e-06	63/1913 3.2%	218/12384 1.7%
31668	cellular response to extracellular stimulus	3.2236e-07	5.4752e-06	163/1913 8.5%	732/12384 5.9%
42446	hormone biosynthetic process	3.7212e-07	6.296e-06	123/1913 6.4%	520/12384 4.1%
9856	pollination	4.0088e-07	6.7566e-06	147/1913 7.6%	648/12384 5.2%
19758	glycosinolate biosynthetic process	4.327e-07	7.2101e-06	92/1913 4.8%	362/12384 2.9%
19761	glucosinolate biosynthetic process	4.327e-07	7.2101e-06	92/1913 4.8%	362/12384 2.9%
16144	S-glycoside biosynthetic process	4.327e-07	7.2101e-06	92/1913 4.8%	362/12384 2.9%
2253	activation of immune response	4.4025e-07	7.3082e-06	37/1913 1.9%	105/12384 0.8%
9821	alkaloid biosynthetic process	4.5719e-07	7.5609e-06	17/1913 0.8%	31/12384 0.2%
2213	defense response to insect	4.6714e-07	7.6964e-06	23/1913 1.2%	51/12384 0.4%
15851	nucleobase transport	4.8036e-07	7.8847e-06	51/1913 2.6%	166/12384 1.3%
16102	diterpenoid biosynthetic process	5.0438e-07	8.2482e-06	46/1913 2.4%	144/12384 1.1%
71496	cellular response to external stimulus	6.6316e-07	1.0805e-05	163/1913 8.5%	740/12384 5.9%
52543	callose deposition in cell wall	9.402e-07	1.5262e-05	44/1913 2.3%	138/12384 1.1%
52386	cell wall thickening	1.0692e-06	1.7292e-05	45/1913 2.3%	143/12384 1.1%
10204	defense response signaling pathway, resistance gene-independent	1.0795e-06	1.7395e-05	19/1913 0.9%	39/12384 0.3%
9063	cellular amino acid catabolic process	1.1052e-06	1.7743e-05	79/1913 4.1%	304/12384 2.4%
9310	amine catabolic process	1.1981e-06	1.9165e-05	93/1913 4.8%	375/12384 3.0%
16101	diterpenoid metabolic process	1.3023e-06	2.0756e-05	51/1913 2.6%	171/12384 1.3%
2832	negative regulation of response to biotic stimulus	1.3325e-06	2.1161e-05	12/1913 0.6%	18/12384 0.1%
9991	response to extracellular stimulus	1.7083e-06	2.7032e-05	182/1913 9.5%	856/12384 6.9%
160	two-component signal transduction system (phosphorelay)	1.9003e-06	2.9962e-05	76/1913 3.9%	293/12384 2.3%
46686	response to cadmium ion	1.9121e-06	3.0041e-05	183/1913 9.5%	863/12384 6.9%
7568	aging	2.0274e-06	3.1738e-05	112/1913 5.8%	478/12384 3.8%
18377	protein myristoylation	2.1024e-06	3.2451e-05	59/1913 3.0%	211/12384 1.7%
18319	protein amino acid myristoylation	2.1024e-06	3.2451e-05	59/1913 3.0%	211/12384 1.7%
6499	N-terminal protein myristoylation	2.1024e-06	3.2451e-05	59/1913 3.0%	211/12384 1.7%
6498	N-terminal protein lipidation	2.1024e-06	3.2451e-05	59/1913 3.0%	211/12384 1.7%
6182	cGMP biosynthetic process	2.3644e-06	3.6368e-05	23/1913 1.2%	55/12384 0.4%
9267	cellular response to starvation	2.4626e-06	3.7746e-05	141/1913 7.3%	635/12384 5.1%
9646	response to absence of light	2.9534e-06	4.5111e-05	27/1913 1.4%	71/12384 0.5%
42343	indole glucosinolate metabolic process	3.0965e-06	4.6963e-05	22/1913 1.1%	52/12384 0.4%
42617	paclitaxel biosynthetic process	3.1067e-06	4.6963e-05	12/1913 0.6%	19/12384 0.1%
42616	paclitaxel metabolic process	3.1067e-06	4.6963e-05	12/1913 0.6%	19/12384 0.1%
9733	response to auxin stimulus	3.312e-06	4.9896e-05	147/1913 7.6%	671/12384 5.4%
9808	lignin metabolic process	3.491e-06	5.2394e-05	49/1913 2.5%	167/12384 1.3%
48878	chemical homeostasis	3.5017e-06	5.2394e-05	156/1913 8.1%	721/12384 5.8%
42594	response to starvation	4.8899e-06	7.2918e-05	152/1913 7.9%	703/12384 5.6%
9190	cyclic nucleotide biosynthetic process	4.9159e-06	7.3058e-05	23/1913 1.2%	57/12384 0.4%
42542	response to hydrogen peroxide	5.1607e-06	7.6437e-05	105/1913 5.4%	450/12384 3.6%
46068	cGMP metabolic process	5.1993e-06	7.675e-05	24/1913 1.2%	61/12384 0.4%
15800	acidic amino acid transport	5.2282e-06	7.6919e-05	20/1913 1.0%	46/12384 0.3%
31669	cellular response to nutrient levels	5.9874e-06	8.7796e-05	143/1913 7.4%	656/12384 5.2%
35304	regulation of protein amino acid dephosphorylation	6.3815e-06	9.3263e-05	47/1913 2.4%	161/12384 1.3%
6694	steroid biosynthetic process	6.4091e-06	9.3357e-05	92/1913 4.8%	384/12384 3.1%
18409	peptide or protein amino-terminal blocking	6.484e-06	9.4136e-05	59/1913 3.0%	218/12384 1.7%
10231	maintenance of seed dormancy	6.6727e-06	9.6556e-05	12/1913 0.6%	20/12384 0.1%
9152	purine ribonucleotide biosynthetic process	6.7365e-06	9.716e-05	51/1913 2.6%	180/12384 1.4%
6732	coenzyme metabolic process	7.257e-06	0.00010432	158/1913 8.2%	741/12384 5.9%
186	activation of MAPKK activity	8.0458e-06	0.00011529	45/1913 2.3%	153/12384 1.2%
31667	response to nutrient levels	8.5313e-06	0.00012185	165/1913 8.6%	782/12384 6.3%
6857	oligopeptide transport	8.6929e-06	0.00012375	53/1913 2.7%	191/12384 1.5%
9187	cyclic nucleotide metabolic process	1.0013e-05	0.00014209	24/1913 1.2%	63/12384 0.5%
16045	detection of bacterium	1.0092e-05	0.00014274	25/1913 1.3%	67/12384 0.5%
34765	regulation of ion transmembrane transport	1.057e-05	0.00014902	61/1913 3.1%	231/12384 1.8%
8202	steroid metabolic process	1.2092e-05	0.00016995	118/1913 6.1%	528/12384 4.2%
9108	coenzyme biosynthetic process	1.2451e-05	0.00017444	63/1913 3.2%	242/12384 1.9%
6695	cholesterol biosynthetic process	1.2753e-05	0.00017809	13/1913 0.6%	24/12384 0.1%
52314	phytoalexin metabolic process	1.3379e-05	0.00018624	12/1913 0.6%	21/12384 0.1%
31365	N-terminal protein amino acid modification	1.3777e-05	0.00019118	59/1913 3.0%	223/12384 1.8%
42219	cellular amino acid derivative catabolic process	1.4098e-05	0.00019503	72/1913 3.7%	288/12384 2.3%
9409	response to cold	1.5829e-05	0.00021829	188/1913 9.8%	920/12384 7.4%
15833	peptide transport	1.732e-05	0.0002381	55/1913 2.8%	205/12384 1.6%
32147	activation of protein kinase activity	1.7653e-05	0.00024192	50/1913 2.6%	181/12384 1.4%
9097	isoleucine biosynthetic process	1.9445e-05	0.00026565	9/1913 0.4%	13/12384 0.1%
9411	response to UV	1.9815e-05	0.00026986	126/1913 6.5%	577/12384 4.6%
45860	positive regulation of protein kinase activity	2.1241e-05	0.00028839	59/1913 3.0%	226/12384 1.8%
70542	response to fatty acid	2.2815e-05	0.00030786	13/1913 0.6%	25/12384 0.2%
19674	NAD metabolic process	2.2815e-05	0.00030786	13/1913 0.6%	25/12384 0.2%
6767	water-soluble vitamin metabolic process	2.3384e-05	0.00031457	55/1913 2.8%	207/12384 1.6%
32409	regulation of transporter activity	2.3675e-05	0.0003156	45/1913 2.3%	159/12384 1.2%
32412	regulation of ion transmembrane transporter activity	2.3675e-05	0.0003156	45/1913 2.3%	159/12384 1.2%
22898	regulation of transmembrane transporter activity	2.3675e-05	0.0003156	45/1913 2.3%	159/12384 1.2%
45338	farnesyl diphosphate metabolic process	2.4682e-05	0.00032802	10/1913 0.5%	16/12384 0.1%
6032	chitin catabolic process	2.5296e-05	0.00033416	12/1913 0.6%	22/12384 0.1%
15812	gamma-aminobutyric acid transport	2.5296e-05	0.00033416	12/1913 0.6%	22/12384 0.1%
46482	para-aminobenzoic acid metabolic process	2.5459e-05	0.00033531	32/1913 1.6%	100/12384 0.8%
9082	branched chain family amino acid biosynthetic process	2.6289e-05	0.00034521	11/1913 0.5%	19/12384 0.1%
48519	negative regulation of biological process	2.7413e-05	0.00035889	428/1913 22.3%	2349/12384 18.9%
33674	positive regulation of kinase activity	2.813e-05	0.00036719	59/1913 3.0%	228/12384 1.8%
51347	positive regulation of transferase activity	2.8301e-05	0.00036833	61/1913 3.1%	238/12384 1.9%
35303	regulation of dephosphorylation	2.8506e-05	0.00036991	50/1913 2.6%	184/12384 1.4%
71417	cellular response to organic nitrogen	3.2513e-05	0.00042066	34/1913 1.7%	110/12384 0.8%
15672	monovalent inorganic cation transport	3.696e-05	0.00047679	105/1913 5.4%	470/12384 3.7%
6026	aminoglycan catabolic process	3.9191e-05	0.0005041	13/1913 0.6%	26/12384 0.2%
9759	indole glucosinolate biosynthetic process	4.1835e-05	0.00053497	15/1913 0.7%	33/12384 0.2%
16093	polyprenol metabolic process	4.1835e-05	0.00053497	15/1913 0.7%	33/12384 0.2%
46655	folic acid metabolic process	4.4354e-05	0.00056555	33/1913 1.7%	107/12384 0.8%
9864	induced systemic resistance, jasmonic acid mediated signaling pathway	4.5465e-05	0.00057471	12/1913 0.6%	23/12384 0.1%
15912	short-chain fatty acid transport	4.5465e-05	0.00057471	12/1913 0.6%	23/12384 0.1%
46348	amino sugar catabolic process	4.5465e-05	0.00057471	12/1913 0.6%	23/12384 0.1%
6586	indolalkylamine metabolic process	4.7271e-05	0.00059583	53/1913 2.7%	202/12384 1.6%
51049	regulation of transport	4.7868e-05	0.00060063	143/1913 7.4%	682/12384 5.5%
9835	ripening	4.8061e-05	0.00060063	27/1913 1.4%	81/12384 0.6%
6835	dicarboxylic acid transport	4.8061e-05	0.00060063	27/1913 1.4%	81/12384 0.6%
42886	amide transport	4.8498e-05	0.00060436	58/1913 3.0%	227/12384 1.8%
15802	basic amino acid transport	4.9054e-05	0.00060958	34/1913 1.7%	112/12384 0.9%
46165	alcohol biosynthetic process	4.9513e-05	0.00061355	201/1913 10.5%	1012/12384 8.1%
31640	killing of cells of another organism	5.0265e-05	0.00062111	11/1913 0.5%	20/12384 0.1%
9605	response to external stimulus	5.1023e-05	0.00062872	296/1913 15.4%	1569/12384 12.6%
42436	indole derivative catabolic process	5.1569e-05	0.00063264	49/1913 2.5%	183/12384 1.4%
52315	phytoalexin biosynthetic process	5.163e-05	0.00063264	10/1913 0.5%	17/12384 0.1%
2229	defense response to oomycetes	5.6065e-05	0.00068509	7/1913 0.3%	9/12384 0.0%
10562	positive regulation of phosphorus metabolic process	6.1129e-05	0.00074283	63/1913 3.2%	254/12384 2.0%
45937	positive regulation of phosphate metabolic process	6.1129e-05	0.00074283	63/1913 3.2%	254/12384 2.0%
6568	tryptophan metabolic process	6.1697e-05	0.00074767	51/1913 2.6%	194/12384 1.5%
16090	prenol metabolic process	6.4227e-05	0.0007762	15/1913 0.7%	34/12384 0.2%
9809	lignin biosynthetic process	6.6793e-05	0.000805	33/1913 1.7%	109/12384 0.8%
52510	positive regulation by organism of defense response of other organism involved in symbiotic interaction	7.3451e-05	0.00088041	16/1913 0.8%	38/12384 0.3%
52509	positive regulation by symbiont of host defense response	7.3451e-05	0.00088041	16/1913 0.8%	38/12384 0.3%
6722	triterpenoid metabolic process	8.0087e-05	0.00095562	17/1913 0.8%	42/12384 0.3%
6576	cellular biogenic amine metabolic process	8.016e-05	0.00095562	85/1913 4.4%	371/12384 2.9%
10618	aerenchyma formation	8.2003e-05	0.00097495	6/1913 0.3%	7/12384 0.0%
9823	cytokinin catabolic process	8.7569e-05	0.0010355	5/1913 0.2%	5/12384 0.0%
42447	hormone catabolic process	8.7569e-05	0.0010355	5/1913 0.2%	5/12384 0.0%
10359	regulation of anion channel activity	9.0827e-05	0.0010712	41/1913 2.1%	148/12384 1.1%
6558	L-phenylalanine metabolic process	0.00010008	0.0011772	10/1913 0.5%	18/12384 0.1%
6549	isoleucine metabolic process	0.00010127	0.0011879	9/1913 0.4%	15/12384 0.1%
90333	regulation of stomatal closure	0.00010413	0.0012183	13/1913 0.6%	28/12384 0.2%
42402	cellular biogenic amine catabolic process	0.00010493	0.0012244	59/1913 3.0%	238/12384 1.9%
6164	purine nucleotide biosynthetic process	0.00010879	0.001266	53/1913 2.7%	208/12384 1.6%
1934	positive regulation of protein amino acid phosphorylation	0.0001173	0.0013615	60/1913 3.1%	244/12384 1.9%
9626	plant-type hypersensitive response	0.00012497	0.0014467	69/1913 3.6%	291/12384 2.3%
9074	aromatic amino acid family catabolic process	0.00013705	0.0015824	45/1913 2.3%	170/12384 1.3%
34050	host programmed cell death induced by symbiont	0.00013947	0.001606	69/1913 3.6%	292/12384 2.3%
10197	polar nucleus fusion	0.00014189	0.0016229	15/1913 0.7%	36/12384 0.2%
9559	embryo sac central cell differentiation	0.00014189	0.0016229	15/1913 0.7%	36/12384 0.2%
10043	response to zinc ion	0.00014204	0.0016229	49/1913 2.5%	190/12384 1.5%
55080	cation homeostasis	0.00014917	0.0016973	103/1913 5.3%	475/12384 3.8%
42327	positive regulation of phosphorylation	0.00014932	0.0016973	60/1913 3.1%	246/12384 1.9%
51384	response to glucocorticoid stimulus	0.00015271	0.0017313	16/1913 0.8%	40/12384 0.3%
9098	leucine biosynthetic process	0.00016183	0.00182	7/1913 0.3%	10/12384 0.0%
48041	focal adhesion assembly	0.00016183	0.00182	7/1913 0.3%	10/12384 0.0%
7044	cell-substrate junction assembly	0.00016183	0.00182	7/1913 0.3%	10/12384 0.0%
80024	indolebutyric acid metabolic process	0.00016219	0.00182	13/1913 0.6%	29/12384 0.2%
70301	cellular response to hydrogen peroxide	0.00016282	0.0018225	51/1913 2.6%	201/12384 1.6%
6855	drug transmembrane transport	0.00016858	0.0018822	30/1913 1.5%	100/12384 0.8%
9690	cytokinin metabolic process	0.00017389	0.0019366	33/1913 1.7%	114/12384 0.9%
6720	isoprenoid metabolic process	0.00017478	0.0019416	135/1913 7.0%	655/12384 5.2%
70838	divalent metal ion transport	0.00017634	0.0019525	105/1913 5.4%	488/12384 3.9%
15931	nucleobase, nucleoside, nucleotide and nucleic acid transport	0.00017665	0.0019525	92/1913 4.8%	417/12384 3.3%
51174	regulation of phosphorus metabolic process	0.00017802	0.0019626	133/1913 6.9%	644/12384 5.2%
15740	C4-dicarboxylate transport	0.00018748	0.0020618	14/1913 0.7%	33/12384 0.2%
71398	cellular response to fatty acid	0.00019973	0.0021863	9/1913 0.4%	16/12384 0.1%
10106	cellular response to iron ion starvation	0.00019979	0.0021863	63/1913 3.2%	264/12384 2.1%
32879	regulation of localization	0.00020029	0.0021863	164/1913 8.5%	822/12384 6.6%
52305	positive regulation by organism of innate immunity in other organism involved in symbiotic interaction	0.00020482	0.0021869	15/1913 0.7%	37/12384 0.2%
52306	modulation by organism of innate immunity in other organism involved in symbiotic interaction	0.00020482	0.0021869	15/1913 0.7%	37/12384 0.2%
52308	pathogen-associated molecular pattern dependent modulation by organism of innate immunity in other organism involved in symbiotic interaction	0.00020482	0.0021869	15/1913 0.7%	37/12384 0.2%
52257	pathogen-associated molecular pattern dependent induction by organism of innate immunity of other organism involved in symbiotic interaction	0.00020482	0.0021869	15/1913 0.7%	37/12384 0.2%
52033	pathogen-associated molecular pattern dependent induction by symbiont of host innate immunity	0.00020482	0.0021869	15/1913 0.7%	37/12384 0.2%
52167	modulation by symbiont of host innate immunity	0.00020482	0.0021869	15/1913 0.7%	37/12384 0.2%
52166	positive regulation by symbiont of host innate immunity	0.00020482	0.0021869	15/1913 0.7%	37/12384 0.2%
52169	pathogen-associated molecular pattern dependent modulation by symbiont of host innate immunity	0.00020482	0.0021869	15/1913 0.7%	37/12384 0.2%
16104	triterpenoid biosynthetic process	0.00020482	0.0021869	15/1913 0.7%	37/12384 0.2%
15893	drug transport	0.00020831	0.0022188	33/1913 1.7%	115/12384 0.9%
15748	organophosphate ester transport	0.00021361	0.0022698	48/1913 2.5%	188/12384 1.5%
31960	response to corticosteroid stimulus	0.00021485	0.0022774	16/1913 0.8%	41/12384 0.3%
15696	ammonium transport	0.00022951	0.002427	29/1913 1.5%	97/12384 0.7%
10162	seed dormancy	0.00023341	0.0024564	61/1913 3.1%	255/12384 2.0%
22611	dormancy process	0.00023341	0.0024564	61/1913 3.1%	255/12384 2.0%
10193	response to ozone	0.00023524	0.0024698	32/1913 1.6%	111/12384 0.8%
9416	response to light stimulus	0.00023724	0.0024848	322/1913 16.8%	1758/12384 14.1%
48523	negative regulation of cellular process	0.00023955	0.0025031	311/1913 16.2%	1692/12384 13.6%
8203	cholesterol metabolic process	0.00024599	0.0025643	13/1913 0.6%	30/12384 0.2%
55085	transmembrane transport	0.00025178	0.0026184	234/1913 12.2%	1234/12384 9.9%
19725	cellular homeostasis	0.00025574	0.0026533	128/1913 6.6%	621/12384 5.0%
6497	protein amino acid lipidation	0.00026124	0.0027024	61/1913 3.1%	256/12384 2.0%
42545	cell wall modification	0.0002617	0.0027024	121/1913 6.3%	582/12384 4.6%
9266	response to temperature stimulus	0.00026389	0.0027186	261/1913 13.6%	1395/12384 11.2%
19932	second-messenger-mediated signaling	0.00027255	0.0028012	59/1913 3.0%	246/12384 1.9%
15809	arginine transport	0.00027375	0.0028071	14/1913 0.7%	34/12384 0.2%
6569	tryptophan catabolic process	0.00027661	0.0028232	43/1913 2.2%	165/12384 1.3%
46218	indolalkylamine catabolic process	0.00027661	0.0028232	43/1913 2.2%	165/12384 1.3%
48584	positive regulation of response to stimulus	0.0002794	0.0028451	82/1913 4.2%	368/12384 2.9%
2764	immune response-regulating signaling pathway	0.00029049	0.0029512	15/1913 0.7%	38/12384 0.3%
34762	regulation of transmembrane transport	0.00029204	0.0029533	61/1913 3.1%	257/12384 2.0%
42158	lipoprotein biosynthetic process	0.00029204	0.0029533	61/1913 3.1%	257/12384 2.0%
52255	modulation by organism of defense response of other organism involved in symbiotic interaction	0.00029777	0.0029771	16/1913 0.8%	42/12384 0.3%
52031	modulation by symbiont of host defense response	0.00029777	0.0029771	16/1913 0.8%	42/12384 0.3%
52200	response to host defenses	0.00029777	0.0029771	16/1913 0.8%	42/12384 0.3%
52173	response to defenses of other organism involved in symbiotic interaction	0.00029777	0.0029771	16/1913 0.8%	42/12384 0.3%
75136	response to host	0.00029777	0.0029771	16/1913 0.8%	42/12384 0.3%
7178	transmembrane receptor protein serine/threonine kinase signaling pathway	0.00029917	0.0029842	30/1913 1.5%	103/12384 0.8%
6884	cell volume homeostasis	0.00031388	0.0031169	10/1913 0.5%	20/12384 0.1%
15810	aspartate transport	0.00031388	0.0031169	10/1913 0.5%	20/12384 0.1%
19220	regulation of phosphate metabolic process	0.00031609	0.0031318	131/1913 6.8%	641/12384 5.1%
42493	response to drug	0.00031824	0.0031459	62/1913 3.2%	263/12384 2.1%
44070	regulation of anion transport	0.00031991	0.0031554	44/1913 2.3%	171/12384 1.3%
15908	fatty acid transport	0.00032285	0.0031772	21/1913 1.0%	63/12384 0.5%
34614	cellular response to reactive oxygen species	0.00035665	0.003502	57/1913 2.9%	238/12384 1.9%
42157	lipoprotein metabolic process	0.00036367	0.0035601	61/1913 3.1%	259/12384 2.0%
43901	negative regulation of multi-organism process	0.00036419	0.0035601	13/1913 0.6%	31/12384 0.2%
273	lipoic acid metabolic process	0.00037856	0.0036842	22/1913 1.1%	68/12384 0.5%
9106	lipoate metabolic process	0.00037856	0.0036842	22/1913 1.1%	68/12384 0.5%
46777	protein amino acid autophosphorylation	0.00038041	0.0036941	81/1913 4.2%	366/12384 2.9%
9685	gibberellin metabolic process	0.0003874	0.0037537	36/1913 1.8%	133/12384 1.0%
16126	sterol biosynthetic process	0.00039466	0.0038156	62/1913 3.2%	265/12384 2.1%
6551	leucine metabolic process	0.00039962	0.0038551	8/1913 0.4%	14/12384 0.1%
70588	calcium ion transmembrane transport	0.00040557	0.0039039	29/1913 1.5%	100/12384 0.8%
6862	nucleotide transport	0.00041399	0.0039713	40/1913 2.0%	153/12384 1.2%
42592	homeostatic process	0.00041437	0.0039713	185/1913 9.6%	956/12384 7.7%
6752	group transfer coenzyme metabolic process	0.00041719	0.0039896	41/1913 2.1%	158/12384 1.2%
9710	tropane alkaloid biosynthetic process	0.00045793	0.0043602	5/1913 0.2%	6/12384 0.0%
46448	tropane alkaloid metabolic process	0.00045793	0.0043602	5/1913 0.2%	6/12384 0.0%
15992	proton transport	0.00045977	0.0043683	49/1913 2.5%	199/12384 1.6%
16051	carbohydrate biosynthetic process	0.00047222	0.0044769	309/1913 16.1%	1696/12384 13.6%
21700	developmental maturation	0.00049501	0.0046829	175/1913 9.1%	901/12384 7.2%
15718	monocarboxylic acid transport	0.00051646	0.0048753	35/1913 1.8%	130/12384 1.0%
55082	cellular chemical homeostasis	0.00051768	0.0048764	107/1913 5.5%	513/12384 4.1%
18874	benzoate metabolic process	0.00052737	0.0049571	13/1913 0.6%	32/12384 0.2%
44282	small molecule catabolic process	0.00054839	0.0051437	346/1913 18.0%	1924/12384 15.5%
30003	cellular cation homeostasis	0.00055163	0.0051461	91/1913 4.7%	425/12384 3.4%
52555	positive regulation by organism of immune response of other organism involved in symbiotic interaction	0.00055684	0.0051461	15/1913 0.7%	40/12384 0.3%
52552	modulation by organism of immune response of other organism involved in symbiotic interaction	0.00055684	0.0051461	15/1913 0.7%	40/12384 0.3%
52553	modulation by symbiont of host immune response	0.00055684	0.0051461	15/1913 0.7%	40/12384 0.3%
52556	positive regulation by symbiont of host immune response	0.00055684	0.0051461	15/1913 0.7%	40/12384 0.3%
52564	response to immune response of other organism involved in symbiotic interaction	0.00055684	0.0051461	15/1913 0.7%	40/12384 0.3%
52572	response to host immune response	0.00055684	0.0051461	15/1913 0.7%	40/12384 0.3%
71472	cellular response to salt stress	0.00056667	0.0052259	20/1913 1.0%	61/12384 0.4%
44272	sulfur compound biosynthetic process	0.00059466	0.0054726	161/1913 8.4%	823/12384 6.6%
9750	response to fructose stimulus	0.00062355	0.0057265	67/1913 3.5%	296/12384 2.3%
9992	cellular water homeostasis	0.0006326	0.0057975	9/1913 0.4%	18/12384 0.1%
48545	response to steroid hormone stimulus	0.0006603	0.0060388	49/1913 2.5%	202/12384 1.6%
50801	ion homeostasis	0.00067259	0.0061384	114/1913 5.9%	556/12384 4.4%
32940	secretion by cell	0.00070382	0.0064101	60/1913 3.1%	260/12384 2.0%
10149	senescence	0.00072858	0.0066083	50/1913 2.6%	208/12384 1.6%
10260	organ senescence	0.00072858	0.0066083	50/1913 2.6%	208/12384 1.6%
6085	acetyl-CoA biosynthetic process	0.00074059	0.0066759	8/1913 0.4%	15/12384 0.1%
6069	ethanol oxidation	0.00074059	0.0066759	8/1913 0.4%	15/12384 0.1%
6734	NADH metabolic process	0.00074059	0.0066759	8/1913 0.4%	15/12384 0.1%
34308	monohydric alcohol metabolic process	0.0007483	0.0067317	13/1913 0.6%	33/12384 0.2%
17085	response to insecticide	0.00075414	0.0067703	15/1913 0.7%	41/12384 0.3%
43408	regulation of MAPKKK cascade	0.00078835	0.007063	56/1913 2.9%	240/12384 1.9%
9085	lysine biosynthetic process	0.00080178	0.0071109	7/1913 0.3%	12/12384 0.0%
9089	lysine biosynthetic process via diaminopimelate	0.00080178	0.0071109	7/1913 0.3%	12/12384 0.0%
33383	geranyl diphosphate metabolic process	0.00080178	0.0071109	7/1913 0.3%	12/12384 0.0%
7160	cell-matrix adhesion	0.00080178	0.0071109	7/1913 0.3%	12/12384 0.0%
46451	diaminopimelate metabolic process	0.00080178	0.0071109	7/1913 0.3%	12/12384 0.0%
15807	L-amino acid transport	0.00081631	0.0072157	21/1913 1.0%	67/12384 0.5%
33574	response to testosterone stimulus	0.00081688	0.0072157	10/1913 0.5%	22/12384 0.1%
6826	iron ion transport	0.00084258	0.0074279	74/1913 3.8%	337/12384 2.7%
48764	trichoblast maturation	0.00089517	0.00786	135/1913 7.0%	680/12384 5.4%
48765	root hair cell differentiation	0.00089517	0.00786	135/1913 7.0%	680/12384 5.4%
9686	gibberellin biosynthetic process	0.00091508	0.0080188	33/1913 1.7%	124/12384 1.0%
34637	cellular carbohydrate biosynthetic process	0.00092006	0.0080464	265/1913 13.8%	1447/12384 11.6%
8299	isoprenoid biosynthetic process	0.00093877	0.0081937	120/1913 6.2%	595/12384 4.8%
80026	response to indolebutyric acid stimulus	0.00094238	0.0082089	11/1913 0.5%	26/12384 0.2%
14075	response to amine stimulus	0.00095101	0.0082678	25/1913 1.3%	86/12384 0.6%
46903	secretion	0.00096315	0.0083568	68/1913 3.5%	306/12384 2.4%
6733	oxidoreduction coenzyme metabolic process	0.00098415	0.0085222	62/1913 3.2%	274/12384 2.2%
10053	root epidermal cell differentiation	0.0010984	0.0094926	141/1913 7.3%	718/12384 5.7%
65007	biological regulation	0.0011098	0.0095722	1120/1913 58.5%	6852/12384 55.3%
9913	epidermal cell differentiation	0.0011648	0.010027	162/1913 8.4%	841/12384 6.7%
6818	hydrogen transport	0.0011707	0.010058	49/1913 2.5%	207/12384 1.6%
9314	response to radiation	0.0011967	0.010261	327/1913 17.0%	1829/12384 14.7%
46164	alcohol catabolic process	0.0012453	0.010608	129/1913 6.7%	651/12384 5.2%
35384	thioester biosynthetic process	0.0012467	0.010608	10/1913 0.5%	23/12384 0.1%
71616	acyl-CoA biosynthetic process	0.0012467	0.010608	10/1913 0.5%	23/12384 0.1%
6067	ethanol metabolic process	0.0012467	0.010608	10/1913 0.5%	23/12384 0.1%
34599	cellular response to oxidative stress	0.0012762	0.010826	60/1913 3.1%	266/12384 2.1%
18130	heterocycle biosynthetic process	0.0012773	0.010826	454/1913 23.7%	2612/12384 21.0%
9081	branched chain family amino acid metabolic process	0.0013295	0.011247	15/1913 0.7%	43/12384 0.3%
31537	regulation of anthocyanin metabolic process	0.0013593	0.011477	22/1913 1.1%	74/12384 0.5%
9124	nucleoside monophosphate biosynthetic process	0.0013683	0.011505	30/1913 1.5%	112/12384 0.9%
71474	cellular hyperosmotic response	0.0013704	0.011505	11/1913 0.5%	27/12384 0.2%
1906	cell killing	0.0013704	0.011505	11/1913 0.5%	27/12384 0.2%
45337	farnesyl diphosphate biosynthetic process	0.0013977	0.011712	5/1913 0.2%	7/12384 0.0%
10054	trichoblast differentiation	0.0014101	0.011793	138/1913 7.2%	705/12384 5.6%
9581	detection of external stimulus	0.0014188	0.011843	50/1913 2.6%	214/12384 1.7%
6030	chitin metabolic process	0.0014246	0.011869	12/1913 0.6%	31/12384 0.2%
34284	response to monosaccharide stimulus	0.0014622	0.012159	79/1913 4.1%	371/12384 2.9%
8300	isoprenoid catabolic process	0.0014881	0.012351	17/1913 0.8%	52/12384 0.4%
9643	photosynthetic acclimation	0.0015061	0.012477	7/1913 0.3%	13/12384 0.1%
9309	amine biosynthetic process	0.0015958	0.013195	162/1913 8.4%	847/12384 6.8%
15691	cadmium ion transport	0.0016136	0.013318	16/1913 0.8%	48/12384 0.3%
51591	response to cAMP	0.0016306	0.013433	9/1913 0.4%	20/12384 0.1%
31540	regulation of anthocyanin biosynthetic process	0.0017333	0.014252	15/1913 0.7%	44/12384 0.3%
43650	dicarboxylic acid biosynthetic process	0.0018442	0.015107	10/1913 0.5%	24/12384 0.1%
10421	hydrogen peroxide-mediated programmed cell death	0.0018442	0.015107	10/1913 0.5%	24/12384 0.1%
9110	vitamin biosynthetic process	0.0018491	0.015119	30/1913 1.5%	114/12384 0.9%
42178	xenobiotic catabolic process	0.0019456	0.015879	11/1913 0.5%	28/12384 0.2%
16128	phytosteroid metabolic process	0.0019609	0.015931	61/1913 3.1%	276/12384 2.2%
19742	pentacyclic triterpenoid metabolic process	0.0019629	0.015931	12/1913 0.6%	32/12384 0.2%
19745	pentacyclic triterpenoid biosynthetic process	0.0019629	0.015931	12/1913 0.6%	32/12384 0.2%
42816	vitamin B6 metabolic process	0.0020949	0.016903	8/1913 0.4%	17/12384 0.1%
42819	vitamin B6 biosynthetic process	0.0020949	0.016903	8/1913 0.4%	17/12384 0.1%
48838	release of seed from dormancy	0.0020949	0.016903	8/1913 0.4%	17/12384 0.1%
9056	catabolic process	0.002098	0.016903	580/1913 30.3%	3416/12384 27.5%
9612	response to mechanical stimulus	0.002154	0.017322	33/1913 1.7%	130/12384 1.0%
16042	lipid catabolic process	0.002391	0.019194	109/1913 5.6%	547/12384 4.4%
42744	hydrogen peroxide catabolic process	0.0024669	0.019588	41/1913 2.1%	172/12384 1.3%
15695	organic cation transport	0.0024746	0.019588	31/1913 1.6%	121/12384 0.9%
10431	seed maturation	0.0024795	0.019588	64/1913 3.3%	295/12384 2.3%
3056	regulation of vascular smooth muscle contraction	0.0024892	0.019588	4/1913 0.2%	5/12384 0.0%
34111	negative regulation of homotypic cell-cell adhesion	0.0024892	0.019588	4/1913 0.2%	5/12384 0.0%
34110	regulation of homotypic cell-cell adhesion	0.0024892	0.019588	4/1913 0.2%	5/12384 0.0%
42386	hemocyte differentiation	0.0024892	0.019588	4/1913 0.2%	5/12384 0.0%
19229	regulation of vasoconstriction	0.0024892	0.019588	4/1913 0.2%	5/12384 0.0%
47496	vesicle transport along microtubule	0.0024892	0.019588	4/1913 0.2%	5/12384 0.0%
90170	regulation of Golgi inheritance	0.0024892	0.019588	4/1913 0.2%	5/12384 0.0%
7362	terminal region determination	0.0024892	0.019588	4/1913 0.2%	5/12384 0.0%
14074	response to purine	0.0025487	0.020021	13/1913 0.6%	37/12384 0.2%
16115	terpenoid catabolic process	0.0025997	0.020269	16/1913 0.8%	50/12384 0.4%
35094	response to nicotine	0.0026125	0.020269	7/1913 0.3%	14/12384 0.1%
9866	induced systemic resistance, ethylene mediated signaling pathway	0.0026125	0.020269	7/1913 0.3%	14/12384 0.1%
33310	chlorophyll a catabolic process	0.0026125	0.020269	7/1913 0.3%	14/12384 0.1%
33304	chlorophyll a metabolic process	0.0026125	0.020269	7/1913 0.3%	14/12384 0.1%
33473	indoleacetic acid conjugate metabolic process	0.0026125	0.020269	7/1913 0.3%	14/12384 0.1%
6108	malate metabolic process	0.0026125	0.020269	7/1913 0.3%	14/12384 0.1%
48443	stamen development	0.0026594	0.02056	60/1913 3.1%	274/12384 2.2%
48466	androecium development	0.0026594	0.02056	60/1913 3.1%	274/12384 2.2%
51763	sesquiterpene catabolic process	0.0027027	0.020821	11/1913 0.5%	29/12384 0.2%
16107	sesquiterpenoid catabolic process	0.0027027	0.020821	11/1913 0.5%	29/12384 0.2%
9746	response to hexose stimulus	0.0027294	0.020991	77/1913 4.0%	368/12384 2.9%
19363	pyridine nucleotide biosynthetic process	0.0030864	0.023695	6/1913 0.3%	11/12384 0.0%
6760	folic acid and derivative metabolic process	0.0031916	0.02446	33/1913 1.7%	133/12384 1.0%
43434	response to peptide hormone stimulus	0.0032275	0.024649	27/1913 1.4%	103/12384 0.8%
42214	terpene metabolic process	0.0032275	0.024649	27/1913 1.4%	103/12384 0.8%
9123	nucleoside monophosphate metabolic process	0.0032449	0.024685	31/1913 1.6%	123/12384 0.9%
6559	L-phenylalanine catabolic process	0.0032526	0.024685	5/1913 0.2%	8/12384 0.0%
10951	negative regulation of endopeptidase activity	0.0032546	0.024685	16/1913 0.8%	51/12384 0.4%
10466	negative regulation of peptidase activity	0.0032546	0.024685	16/1913 0.8%	51/12384 0.4%
6553	lysine metabolic process	0.0032647	0.024718	8/1913 0.4%	18/12384 0.1%
46683	response to organophosphorus	0.0033349	0.025206	13/1913 0.6%	38/12384 0.3%
60904	regulation of protein folding in endoplasmic reticulum	0.0036812	0.027565	3/1913 0.1%	3/12384 0.0%
46689	response to mercury ion	0.0036812	0.027565	3/1913 0.1%	3/12384 0.0%
8652	cellular amino acid biosynthetic process	0.0036949	0.027565	152/1913 7.9%	805/12384 6.5%
8204	ergosterol metabolic process	0.0037221	0.027565	10/1913 0.5%	26/12384 0.2%
71475	cellular hyperosmotic salinity response	0.0037221	0.027565	10/1913 0.5%	26/12384 0.2%
71230	cellular response to amino acid stimulus	0.0037221	0.027565	10/1913 0.5%	26/12384 0.2%
71229	cellular response to acid	0.0037221	0.027565	10/1913 0.5%	26/12384 0.2%
71418	cellular response to amine stimulus	0.0037221	0.027565	10/1913 0.5%	26/12384 0.2%
44108	cellular alcohol biosynthetic process	0.0037221	0.027565	10/1913 0.5%	26/12384 0.2%
44107	cellular alcohol metabolic process	0.0037221	0.027565	10/1913 0.5%	26/12384 0.2%
6696	ergosterol biosynthetic process	0.0037221	0.027565	10/1913 0.5%	26/12384 0.2%
15801	aromatic amino acid transport	0.0037221	0.027565	10/1913 0.5%	26/12384 0.2%
51592	response to calcium ion	0.0039536	0.02923	14/1913 0.7%	43/12384 0.3%
55081	anion homeostasis	0.0040398	0.029817	16/1913 0.8%	52/12384 0.4%
16131	brassinosteroid metabolic process	0.0042272	0.031148	57/1913 2.9%	263/12384 2.1%
42822	pyridoxal phosphate metabolic process	0.0042505	0.031215	7/1913 0.3%	15/12384 0.1%
42823	pyridoxal phosphate biosynthetic process	0.0042505	0.031215	7/1913 0.3%	15/12384 0.1%
3333	amino acid transmembrane transport	0.004301	0.031534	27/1913 1.4%	105/12384 0.8%
9642	response to light intensity	0.0045321	0.033172	77/1913 4.0%	375/12384 3.0%
51761	sesquiterpene metabolic process	0.0047053	0.034383	22/1913 1.1%	81/12384 0.6%
5991	trehalose metabolic process	0.004884	0.035529	8/1913 0.4%	19/12384 0.1%
15827	tryptophan transport	0.004884	0.035529	8/1913 0.4%	19/12384 0.1%
51186	cofactor metabolic process	0.0048864	0.035529	198/1913 10.3%	1085/12384 8.7%
35235	ionotropic glutamate receptor signaling pathway	0.0051055	0.036835	10/1913 0.5%	27/12384 0.2%
43290	apocarotenoid catabolic process	0.0051055	0.036835	10/1913 0.5%	27/12384 0.2%
7215	glutamate signaling pathway	0.0051055	0.036835	10/1913 0.5%	27/12384 0.2%
46345	abscisic acid catabolic process	0.0051055	0.036835	10/1913 0.5%	27/12384 0.2%
45333	cellular respiration	0.0051078	0.036835	34/1913 1.7%	142/12384 1.1%
9871	jasmonic acid and ethylene-dependent systemic resistance, ethylene mediated signaling pathway	0.005371	0.03867	6/1913 0.3%	12/12384 0.0%
71554	cell wall organization or biogenesis	0.0055022	0.039549	268/1913 14.0%	1512/12384 12.2%
1101	response to acid	0.0056013	0.040196	23/1913 1.2%	87/12384 0.7%
71470	cellular response to osmotic stress	0.0056186	0.040254	28/1913 1.4%	112/12384 0.9%
9934	regulation of meristem structural organization	0.0057007	0.040776	18/1913 0.9%	63/12384 0.5%
48469	cell maturation	0.0057933	0.041372	136/1913 7.1%	720/12384 5.8%
7167	enzyme linked receptor protein signaling pathway	0.0059971	0.042562	40/1913 2.0%	175/12384 1.4%
9861	jasmonic acid and ethylene-dependent systemic resistance	0.0059988	0.042562	12/1913 0.6%	36/12384 0.2%
9631	cold acclimation	0.0059988	0.042562	12/1913 0.6%	36/12384 0.2%
80050	regulation of seed development	0.0059988	0.042562	12/1913 0.6%	36/12384 0.2%
6873	cellular ion homeostasis	0.006059	0.04292	95/1913 4.9%	482/12384 3.8%
10480	microsporocyte differentiation	0.0062342	0.04409	14/1913 0.7%	45/12384 0.3%
10150	leaf senescence	0.0062532	0.044154	35/1913 1.8%	149/12384 1.2%
46364	monosaccharide biosynthetic process	0.0062797	0.04427	102/1913 5.3%	523/12384 4.2%
52317	camalexin metabolic process	0.0063903	0.044763	5/1913 0.2%	9/12384 0.0%
10120	camalexin biosynthetic process	0.0063903	0.044763	5/1913 0.2%	9/12384 0.0%
9423	chorismate biosynthetic process	0.0063903	0.044763	5/1913 0.2%	9/12384 0.0%
32570	response to progesterone stimulus	0.0063903	0.044763	5/1913 0.2%	9/12384 0.0%
42364	water-soluble vitamin biosynthetic process	0.0064334	0.044993	22/1913 1.1%	83/12384 0.6%
19722	calcium-mediated signaling	0.0064623	0.045018	27/1913 1.4%	108/12384 0.8%
43627	response to estrogen stimulus	0.0064703	0.045018	11/1913 0.5%	32/12384 0.2%
60416	response to growth hormone stimulus	0.0064703	0.045018	11/1913 0.5%	32/12384 0.2%
43649	dicarboxylic acid catabolic process	0.0065517	0.045018	4/1913 0.2%	6/12384 0.0%
9099	valine biosynthetic process	0.0065517	0.045018	4/1913 0.2%	6/12384 0.0%
9435	NAD biosynthetic process	0.0065517	0.045018	4/1913 0.2%	6/12384 0.0%
22408	negative regulation of cell-cell adhesion	0.0065517	0.045018	4/1913 0.2%	6/12384 0.0%
48678	response to axon injury	0.0065517	0.045018	4/1913 0.2%	6/12384 0.0%
6940	regulation of smooth muscle contraction	0.0065517	0.045018	4/1913 0.2%	6/12384 0.0%
7354	zygotic determination of anterior/posterior axis, embryo	0.0065517	0.045018	4/1913 0.2%	6/12384 0.0%
2215	defense response to nematode	0.0065597	0.045018	7/1913 0.3%	16/12384 0.1%
80088	spermidine hydroxycinnamate conjugate biosynthetic process	0.0065597	0.045018	7/1913 0.3%	16/12384 0.1%
50794	regulation of cellular process	0.0066784	0.04576	901/1913 47.0%	5509/12384 44.4%
162	tryptophan biosynthetic process	0.0068609	0.046938	10/1913 0.5%	28/12384 0.2%
19362	pyridine nucleotide metabolic process	0.0069865	0.047682	44/1913 2.3%	198/12384 1.5%
42451	purine nucleoside biosynthetic process	0.0070172	0.047682	30/1913 1.5%	124/12384 1.0%
46129	purine ribonucleoside biosynthetic process	0.0070172	0.047682	30/1913 1.5%	124/12384 1.0%
10132	dhurrin biosynthetic process	0.007053	0.047682	8/1913 0.4%	20/12384 0.1%
19756	cyanogenic glycoside biosynthetic process	0.007053	0.047682	8/1913 0.4%	20/12384 0.1%
42341	cyanogenic glycoside metabolic process	0.007053	0.047682	8/1913 0.4%	20/12384 0.1%
60871	cellular cell wall disassembly	0.0070671	0.047682	19/1913 0.9%	69/12384 0.5%
9830	cell wall modification involved in abscission	0.0070671	0.047682	19/1913 0.9%	69/12384 0.5%
44277	cell wall disassembly	0.0070671	0.047682	19/1913 0.9%	69/12384 0.5%
34440	lipid oxidation	0.0071819	0.048381	48/1913 2.5%	220/12384 1.7%
10286	heat acclimation	0.0073077	0.049022	37/1913 1.9%	161/12384 1.3%
8544	epidermis development	0.0073104	0.049022	169/1913 8.8%	921/12384 7.4%
7398	ectoderm development	0.0073104	0.049022	169/1913 8.8%	921/12384 7.4%

## Sheet: Up_molecular_function
GO-ID	Description	p-val	adj p-val	cluster freq	total freq
16491	oxidoreductase activity	1.0802e-28	1.8893e-25	433/1839 23.5%	1749/11924 14.6%
30246	carbohydrate binding	2.5177e-24	2.2017e-21	154/1839 8.3%	447/11924 3.7%
4674	protein serine/threonine kinase activity	1.4797e-19	8.6269e-17	226/1839 12.2%	833/11924 6.9%
5506	iron ion binding	6.2741e-16	2.7434e-13	139/1839 7.5%	465/11924 3.8%
4672	protein kinase activity	1.447e-15	5.0617e-13	230/1839 12.5%	916/11924 7.6%
16705	oxidoreductase activity, acting on paired donors, with incorporation or reduction of molecular oxygen	8.2885e-15	2.4161e-12	120/1839 6.5%	391/11924 3.2%
3824	catalytic activity	1.0053e-14	2.5117e-12	1353/1839 73.5%	7858/11924 65.9%
16301	kinase activity	1.5492e-14	3.3869e-12	310/1839 16.8%	1360/11924 11.4%
16773	phosphotransferase activity, alcohol group as acceptor	2.9083e-13	5.6519e-11	249/1839 13.5%	1059/11924 8.8%
20037	heme binding	4.5576e-13	7.9713e-11	93/1839 5.0%	289/11924 2.4%
48037	cofactor binding	4.7334e-12	7.526e-10	127/1839 6.9%	458/11924 3.8%
4702	receptor signaling protein serine/threonine kinase activity	1.0061e-11	1.4663e-09	75/1839 4.0%	224/11924 1.8%
5057	receptor signaling protein activity	1.6405e-11	2.2071e-09	75/1839 4.0%	226/11924 1.8%
46906	tetrapyrrole binding	2.6113e-11	3.2622e-09	93/1839 5.0%	308/11924 2.5%
30247	polysaccharide binding	3.644e-11	3.9833e-09	54/1839 2.9%	142/11924 1.1%
1871	pattern binding	3.644e-11	3.9833e-09	54/1839 2.9%	142/11924 1.1%
80044	quercetin 7-O-glucosyltransferase activity	1.5977e-10	1.6438e-08	43/1839 2.3%	104/11924 0.8%
50502	cis-zeatin O-beta-D-glucosyltransferase activity	2.3174e-10	2.1332e-08	35/1839 1.9%	76/11924 0.6%
50403	trans-zeatin O-beta-D-glucosyltransferase activity	2.3174e-10	2.1332e-08	35/1839 1.9%	76/11924 0.6%
4497	monooxygenase activity	2.6448e-10	2.3129e-08	81/1839 4.4%	265/11924 2.2%
16740	transferase activity	3.8873e-10	3.2376e-08	600/1839 32.6%	3180/11924 26.6%
19842	vitamin binding	7.1893e-10	5.7155e-08	63/1839 3.4%	190/11924 1.5%
80043	quercetin 3-O-glucosyltransferase activity	1.7183e-09	1.3066e-07	37/1839 2.0%	88/11924 0.7%
9055	electron carrier activity	1.8566e-09	1.353e-07	90/1839 4.8%	317/11924 2.6%
16709	oxidoreductase activity, acting on paired donors, with incorporation or reduction of molecular oxygen, NADH or NADPH as one donor, and incorporation of one atom of oxygen	2.2767e-09	1.5928e-07	52/1839 2.8%	148/11924 1.2%
47893	flavonol 3-O-glucosyltransferase activity	2.5084e-09	1.6874e-07	37/1839 2.0%	89/11924 0.7%
50662	coenzyme binding	2.9581e-09	1.9162e-07	93/1839 5.0%	334/11924 2.8%
15291	secondary active transmembrane transporter activity	4.6736e-09	2.9193e-07	84/1839 4.5%	294/11924 2.4%
15075	ion transmembrane transporter activity	8.9965e-09	5.4258e-07	165/1839 8.9%	708/11924 5.9%
43167	ion binding	9.6313e-09	5.615e-07	944/1839 51.3%	5401/11924 45.2%
43168	anion binding	2.366e-08	1.3349e-06	547/1839 29.7%	2932/11924 24.5%
19199	transmembrane receptor protein kinase activity	3.9125e-08	2.0617e-06	54/1839 2.9%	168/11924 1.4%
4871	signal transducer activity	4.0078e-08	2.0617e-06	131/1839 7.1%	543/11924 4.5%
60089	molecular transducer activity	4.0078e-08	2.0617e-06	131/1839 7.1%	543/11924 4.5%
16641	oxidoreductase activity, acting on the CH-NH2 group of donors, oxygen as acceptor	4.1489e-08	2.0732e-06	23/1839 1.2%	46/11924 0.3%
4888	transmembrane receptor activity	4.8427e-08	2.3528e-06	75/1839 4.0%	265/11924 2.2%
31406	carboxylic acid binding	9.6256e-08	4.55e-06	68/1839 3.6%	236/11924 1.9%
5516	calmodulin binding	1.0747e-07	4.8982e-06	64/1839 3.4%	218/11924 1.8%
80046	quercetin 4'-O-glucosyltransferase activity	1.0922e-07	4.8982e-06	30/1839 1.6%	73/11924 0.6%
16829	lyase activity	1.2159e-07	5.2373e-06	117/1839 6.3%	480/11924 4.0%
22891	substrate-specific transmembrane transporter activity	1.2277e-07	5.2373e-06	181/1839 9.8%	821/11924 6.8%
16772	transferase activity, transferring phosphorus-containing groups	1.2582e-07	5.2393e-06	321/1839 17.4%	1614/11924 13.5%
8324	cation transmembrane transporter activity	1.449e-07	5.8937e-06	120/1839 6.5%	497/11924 4.1%
5509	calcium ion binding	1.5587e-07	6.1958e-06	81/1839 4.4%	301/11924 2.5%
22857	transmembrane transporter activity	1.9718e-07	7.6637e-06	196/1839 10.6%	909/11924 7.6%
16638	oxidoreductase activity, acting on the CH-NH2 group of donors	2.7895e-07	1.0606e-05	25/1839 1.3%	57/11924 0.4%
16661	oxidoreductase activity, acting on other nitrogenous compounds as donors	2.9151e-07	1.0848e-05	13/1839 0.7%	19/11924 0.1%
4872	receptor activity	3.3729e-07	1.229e-05	83/1839 4.5%	316/11924 2.6%
31418	L-ascorbic acid binding	3.9465e-07	1.4087e-05	28/1839 1.5%	69/11924 0.5%
48029	monosaccharide binding	4.477e-07	1.5353e-05	35/1839 1.9%	97/11924 0.8%
5529	sugar binding	4.477e-07	1.5353e-05	35/1839 1.9%	97/11924 0.8%
16614	oxidoreductase activity, acting on CH-OH group of donors	7.7599e-07	2.61e-05	80/1839 4.3%	307/11924 2.5%
16679	oxidoreductase activity, acting on diphenols and related substances as donors	8.1092e-07	2.676e-05	34/1839 1.8%	95/11924 0.7%
16616	oxidoreductase activity, acting on the CH-OH group of donors, NAD or NADP as acceptor	1.1298e-06	3.6592e-05	74/1839 4.0%	280/11924 2.3%
15297	antiporter activity	1.25e-06	3.975e-05	40/1839 2.1%	122/11924 1.0%
50597	taxane 10-beta-hydroxylase activity	1.3595e-06	4.2461e-05	10/1839 0.5%	13/11924 0.1%
22804	active transmembrane transporter activity	1.4735e-06	4.5214e-05	116/1839 6.3%	497/11924 4.1%
4383	guanylate cyclase activity	2.2931e-06	6.5747e-05	23/1839 1.2%	55/11924 0.4%
80032	methyl jasmonate esterase activity	2.2931e-06	6.5747e-05	23/1839 1.2%	55/11924 0.4%
80030	methyl indole-3-acetate esterase activity	2.2931e-06	6.5747e-05	23/1839 1.2%	55/11924 0.4%
80031	methyl salicylate esterase activity	2.2931e-06	6.5747e-05	23/1839 1.2%	55/11924 0.4%
9975	cyclase activity	2.6748e-06	7.5455e-05	25/1839 1.3%	63/11924 0.5%
16682	oxidoreductase activity, acting on diphenols and related substances as donors, oxygen as acceptor	2.8078e-06	7.795e-05	30/1839 1.6%	83/11924 0.6%
5507	copper ion binding	2.8763e-06	7.8605e-05	67/1839 3.6%	252/11924 2.1%
4675	transmembrane receptor protein serine/threonine kinase activity	3.752e-06	0.00010096	25/1839 1.3%	64/11924 0.5%
15300	solute:solute antiporter activity	3.8291e-06	0.00010147	29/1839 1.5%	80/11924 0.6%
4713	protein tyrosine kinase activity	3.9388e-06	0.00010282	69/1839 3.7%	264/11924 2.2%
22892	substrate-specific transporter activity	4.1645e-06	0.00010711	191/1839 10.3%	920/11924 7.7%
16706	oxidoreductase activity, acting on paired donors, with incorporation or reduction of molecular oxygen, 2-oxoglutarate as one donor, and incorporation of one atom each of oxygen into both donors	4.2688e-06	0.0001082	39/1839 2.1%	123/11924 1.0%
22890	inorganic cation transmembrane transporter activity	4.8201e-06	0.00012043	96/1839 5.2%	403/11924 3.3%
35251	UDP-glucosyltransferase activity	5.2025e-06	0.00012816	54/1839 2.9%	193/11924 1.6%
16701	oxidoreductase activity, acting on single donors with incorporation of molecular oxygen	6.071e-06	0.00014747	50/1839 2.7%	175/11924 1.4%
15172	acidic amino acid transmembrane transporter activity	9.8782e-06	0.00023461	19/1839 1.0%	44/11924 0.3%
5215	transporter activity	9.9263e-06	0.00023461	212/1839 11.5%	1052/11924 8.8%
50604	taxadiene 5-alpha-hydroxylase activity	1.0584e-05	0.00024403	10/1839 0.5%	15/11924 0.1%
8131	amine oxidase activity	1.0604e-05	0.00024403	8/1839 0.4%	10/11924 0.0%
30554	adenyl nucleotide binding	1.1818e-05	0.00026843	433/1839 23.5%	2366/11924 19.8%
4568	chitinase activity	1.3144e-05	0.00028739	12/1839 0.6%	21/11924 0.1%
16838	carbon-oxygen lyase activity, acting on phosphates	1.3144e-05	0.00028739	12/1839 0.6%	21/11924 0.1%
16849	phosphorus-oxygen lyase activity	1.3145e-05	0.00028739	23/1839 1.2%	60/11924 0.5%
16628	oxidoreductase activity, acting on the CH-CH group of donors, NAD or NADP as acceptor	1.3905e-05	0.00030025	93/1839 5.0%	397/11924 3.3%
46993	oxidoreductase activity, acting on X-H and Y-H to form an X-Y bond, with oxygen as acceptor	1.6134e-05	0.00033999	15/1839 0.8%	31/11924 0.2%
46992	oxidoreductase activity, acting on X-H and Y-H to form an X-Y bond	1.6134e-05	0.00033999	15/1839 0.8%	31/11924 0.2%
50589	leucocyanidin oxygenase activity	1.7132e-05	0.00035671	21/1839 1.1%	53/11924 0.4%
51213	dioxygenase activity	1.735e-05	0.000357	51/1839 2.7%	186/11924 1.5%
10333	terpene synthase activity	1.9176e-05	0.00038999	9/1839 0.4%	13/11924 0.1%
16702	oxidoreductase activity, acting on single donors with incorporation of molecular oxygen, incorporation of two atoms of oxygen	1.9961e-05	0.00040128	46/1839 2.5%	163/11924 1.3%
8061	chitin binding	2.0811e-05	0.00041362	16/1839 0.8%	35/11924 0.2%
8762	UDP-N-acetylmuramate dehydrogenase activity	2.2394e-05	0.00044009	13/1839 0.7%	25/11924 0.2%
50660	FAD binding	2.2935e-05	0.0004457	35/1839 1.9%	113/11924 0.9%
50598	taxane 13-alpha-hydroxylase activity	2.4312e-05	0.00046687	10/1839 0.5%	16/11924 0.1%
16903	oxidoreductase activity, acting on the aldehyde or oxo group of donors	2.4558e-05	0.00046687	32/1839 1.7%	100/11924 0.8%
15185	L-gamma-aminobutyric acid transmembrane transporter activity	2.4859e-05	0.0004675	12/1839 0.6%	22/11924 0.1%
16627	oxidoreductase activity, acting on the CH-CH group of donors	3.1497e-05	0.00058605	102/1839 5.5%	453/11924 3.7%
15082	di-, tri-valent inorganic cation transmembrane transporter activity	3.7013e-05	0.00068142	50/1839 2.7%	186/11924 1.5%
5262	calcium channel activity	4.2672e-05	0.00077742	24/1839 1.3%	68/11924 0.5%
16209	antioxidant activity	4.3837e-05	0.00079042	51/1839 2.7%	192/11924 1.6%
15635	short-chain fatty acid transporter activity	4.4692e-05	0.00079762	12/1839 0.6%	23/11924 0.1%
16754	sinapoylglucose-malate O-sinapoyltransferase activity	4.6319e-05	0.00081831	9/1839 0.4%	14/11924 0.1%
46527	glucosyltransferase activity	5.2514e-05	0.00091848	55/1839 2.9%	213/11924 1.7%
15245	fatty acid transporter activity	5.4396e-05	0.00094197	17/1839 0.9%	41/11924 0.3%
16629	12-oxophytodienoate reductase activity	5.545e-05	0.00095081	7/1839 0.3%	9/11924 0.0%
15299	solute:hydrogen antiporter activity	5.8489e-05	0.00099317	18/1839 0.9%	45/11924 0.3%
16651	oxidoreductase activity, acting on NADH or NADPH	7.149e-05	0.0012023	45/1839 2.4%	166/11924 1.3%
4709	MAP kinase kinase kinase activity	7.3882e-05	0.0012307	41/1839 2.2%	147/11924 1.2%
4022	alcohol dehydrogenase (NAD) activity	8.2355e-05	0.0013589	18/1839 0.9%	46/11924 0.3%
15298	solute:cation antiporter activity	8.4199e-05	0.0013763	19/1839 1.0%	50/11924 0.4%
19139	cytokinin dehydrogenase activity	8.6856e-05	0.0013974	5/1839 0.2%	5/11924 0.0%
50468	reticuline oxidase activity	8.7088e-05	0.0013974	8/1839 0.4%	12/11924 0.1%
16840	carbon-nitrogen lyase activity	8.9426e-05	0.0014219	11/1839 0.5%	21/11924 0.1%
15020	glucuronosyltransferase activity	9.418e-05	0.0014635	24/1839 1.3%	71/11924 0.5%
30414	peptidase inhibitor activity	9.4555e-05	0.0014635	15/1839 0.8%	35/11924 0.2%
4866	endopeptidase inhibitor activity	9.4555e-05	0.0014635	15/1839 0.8%	35/11924 0.2%
15085	calcium ion transmembrane transporter activity	9.7973e-05	0.0014937	29/1839 1.5%	93/11924 0.7%
47202	sinapoylglucose-choline O-sinapoyltransferase activity	9.9921e-05	0.0014937	9/1839 0.4%	15/11924 0.1%
16753	O-sinapoyltransferase activity	9.9921e-05	0.0014937	9/1839 0.4%	15/11924 0.1%
16752	sinapoyltransferase activity	9.9921e-05	0.0014937	9/1839 0.4%	15/11924 0.1%
9815	1-aminocyclopropane-1-carboxylate oxidase activity	0.0001023	0.0015163	13/1839 0.7%	28/11924 0.2%
45735	nutrient reservoir activity	0.00011441	0.0016815	18/1839 0.9%	47/11924 0.3%
43169	cation binding	0.00012763	0.0018556	560/1839 30.4%	3209/11924 26.9%
32440	2-alkenal reductase activity	0.00012837	0.0018556	74/1839 4.0%	318/11924 2.6%
16620	oxidoreductase activity, acting on the aldehyde or oxo group of donors, NAD or NADP as acceptor	0.00013768	0.0019738	22/1839 1.1%	64/11924 0.5%
18548	pentaerythritol tetranitrate reductase activity	0.00016009	0.0022764	7/1839 0.3%	10/11924 0.0%
45431	flavonol synthase activity	0.00017819	0.0024916	22/1839 1.1%	65/11924 0.5%
70546	L-phenylalanine aminotransferase activity	0.0001795	0.0024916	10/1839 0.5%	19/11924 0.1%
80130	L-phenylalanine:2-oxoglutarate aminotransferase activity	0.0001795	0.0024916	10/1839 0.5%	19/11924 0.1%
46872	metal ion binding	0.00019179	0.0026413	540/1839 29.3%	3096/11924 25.9%
8374	O-acyltransferase activity	0.00021233	0.0029013	34/1839 1.8%	120/11924 1.0%
15175	neutral amino acid transmembrane transporter activity	0.00021409	0.0029027	17/1839 0.9%	45/11924 0.3%
4185	serine-type carboxypeptidase activity	0.00026886	0.0036172	14/1839 0.7%	34/11924 0.2%
31625	ubiquitin protein ligase binding	0.00028024	0.0037415	37/1839 2.0%	136/11924 1.1%
45552	dihydrokaempferol 4-reductase activity	0.00036168	0.0047922	9/1839 0.4%	17/11924 0.1%
70279	vitamin B6 binding	0.00036802	0.0048034	28/1839 1.5%	95/11924 0.7%
30170	pyridoxal phosphate binding	0.00036802	0.0048034	28/1839 1.5%	95/11924 0.7%
4091	carboxylesterase activity	0.00038131	0.0049058	57/1839 3.0%	239/11924 2.0%
8843	endochitinase activity	0.00038147	0.0049058	7/1839 0.3%	11/11924 0.0%
15174	basic amino acid transmembrane transporter activity	0.00038506	0.0049158	14/1839 0.7%	35/11924 0.2%
61135	endopeptidase regulator activity	0.00039781	0.0050418	15/1839 0.8%	39/11924 0.3%
46873	metal ion transmembrane transporter activity	0.00045093	0.0056354	63/1839 3.4%	272/11924 2.2%
50358	tropinone reductase activity	0.00045431	0.0056354	5/1839 0.2%	6/11924 0.0%
50356	tropine dehydrogenase activity	0.00045431	0.0056354	5/1839 0.2%	6/11924 0.0%
16746	transferase activity, transferring acyl groups	0.00049832	0.0061378	90/1839 4.8%	419/11924 3.5%
4601	peroxidase activity	0.00053007	0.0064382	40/1839 2.1%	155/11924 1.2%
16684	oxidoreductase activity, acting on peroxide as acceptor	0.00053007	0.0064382	40/1839 2.1%	155/11924 1.2%
5524	ATP binding	0.00055878	0.0066228	390/1839 21.2%	2198/11924 18.4%
4503	monophenol monooxygenase activity	0.00056421	0.0066228	4/1839 0.2%	4/11924 0.0%
4097	catechol oxidase activity	0.00056421	0.0066228	4/1839 0.2%	4/11924 0.0%
16716	oxidoreductase activity, acting on paired donors, with incorporation or reduction of molecular oxygen, another compound as one donor, and incorporation of one atom of oxygen	0.00056421	0.0066228	4/1839 0.2%	4/11924 0.0%
45548	phenylalanine ammonia-lyase activity	0.00056421	0.0066228	4/1839 0.2%	4/11924 0.0%
32559	adenyl ribonucleotide binding	0.00056975	0.0066433	400/1839 21.7%	2260/11924 18.9%
45486	naringenin 3-dioxygenase activity	0.00068365	0.0079185	17/1839 0.9%	49/11924 0.4%
47218	hydroxycinnamate 4-beta-glucosyltransferase activity	0.00069603	0.0079565	12/1839 0.6%	29/11924 0.2%
50590	desacetoxyvindoline 4-hydroxylase activity	0.00069603	0.0079565	12/1839 0.6%	29/11924 0.2%
15179	L-amino acid transmembrane transporter activity	0.00070115	0.0079631	20/1839 1.0%	62/11924 0.5%
47890	flavanone 4-reductase activity	0.00073565	0.008301	6/1839 0.3%	9/11924 0.0%
8514	organic anion transmembrane transporter activity	0.0007623	0.0085174	45/1839 2.4%	183/11924 1.5%
8028	monocarboxylic acid transmembrane transporter activity	0.00076457	0.0085174	19/1839 1.0%	58/11924 0.4%
8509	anion transmembrane transporter activity	0.0007899	0.0087296	67/1839 3.6%	299/11924 2.5%
3959	NADPH dehydrogenase activity	0.0007936	0.0087296	7/1839 0.3%	12/11924 0.1%
47807	cytokinin 7-beta-glucosyltransferase activity	0.00080598	0.0087557	10/1839 0.5%	22/11924 0.1%
80062	cytokinin 9-beta-glucosyltransferase activity	0.00080598	0.0087557	10/1839 0.5%	22/11924 0.1%
50253	retinyl-palmitate esterase activity	0.00082798	0.0089391	18/1839 0.9%	54/11924 0.4%
16597	amino acid binding	0.00088761	0.0095241	33/1839 1.7%	124/11924 1.0%
16405	CoA-ligase activity	0.000929	0.0098474	11/1839 0.5%	26/11924 0.2%
50284	sinapate 1-glucosyltransferase activity	0.000929	0.0098474	11/1839 0.5%	26/11924 0.2%
61134	peptidase regulator activity	0.00098994	0.01043	15/1839 0.8%	42/11924 0.3%
47213	anthocyanidin 3-O-glucosyltransferase activity	0.0010255	0.010551	13/1839 0.7%	34/11924 0.2%
47205	quinate O-hydroxycinnamoyltransferase activity	0.0010255	0.010551	13/1839 0.7%	34/11924 0.2%
47172	shikimate O-hydroxycinnamoyltransferase activity	0.0010255	0.010551	13/1839 0.7%	34/11924 0.2%
50737	O-hydroxycinnamoyltransferase activity	0.0010255	0.010551	13/1839 0.7%	34/11924 0.2%
43176	amine binding	0.0010491	0.01073	35/1839 1.9%	135/11924 1.1%
15077	monovalent inorganic cation transmembrane transporter activity	0.0012247	0.012368	57/1839 3.0%	250/11924 2.0%
80002	UDP-glucose:4-aminobenzoate acylglucosyltransferase activity	0.0012304	0.012368	10/1839 0.5%	23/11924 0.1%
10294	abscisic acid glucosyltransferase activity	0.0012304	0.012368	10/1839 0.5%	23/11924 0.1%
16758	transferase activity, transferring hexosyl groups	0.0013306	0.013299	80/1839 4.3%	376/11924 3.1%
17076	purine nucleotide binding	0.0013633	0.013477	445/1839 24.1%	2564/11924 21.5%
70008	serine-type exopeptidase activity	0.0013676	0.013477	14/1839 0.7%	39/11924 0.3%
15078	hydrogen ion transmembrane transporter activity	0.0013831	0.013477	36/1839 1.9%	142/11924 1.1%
8940	nitrate reductase activity	0.001387	0.013477	5/1839 0.2%	7/11924 0.0%
4506	squalene monooxygenase activity	0.001387	0.013477	5/1839 0.2%	7/11924 0.0%
50734	hydroxycinnamoyltransferase activity	0.0014039	0.013566	13/1839 0.7%	35/11924 0.2%
15238	drug transmembrane transporter activity	0.0014455	0.013891	27/1839 1.4%	98/11924 0.8%
1653	peptide receptor activity	0.0014602	0.013955	17/1839 0.9%	52/11924 0.4%
15276	ligand-gated ion channel activity	0.001493	0.014115	21/1839 1.1%	70/11924 0.5%
22834	ligand-gated channel activity	0.001493	0.014115	21/1839 1.1%	70/11924 0.5%
5319	lipid transporter activity	0.0015126	0.014223	24/1839 1.3%	84/11924 0.7%
1883	purine nucleoside binding	0.001558	0.014572	444/1839 24.1%	2562/11924 21.4%
1882	nucleoside binding	0.0015968	0.014719	445/1839 24.1%	2569/11924 21.5%
4420	hydroxymethylglutaryl-CoA reductase (NADPH) activity	0.001599	0.014719	6/1839 0.3%	10/11924 0.0%
16841	ammonia-lyase activity	0.001599	0.014719	6/1839 0.3%	10/11924 0.0%
4180	carboxypeptidase activity	0.0016737	0.015326	20/1839 1.0%	66/11924 0.5%
46914	transition metal ion binding	0.0020447	0.018626	363/1839 19.7%	2069/11924 17.3%
16229	steroid dehydrogenase activity	0.0023135	0.020966	17/1839 0.9%	54/11924 0.4%
47251	thiohydroximate beta-D-glucosyltransferase activity	0.0024373	0.021741	9/1839 0.4%	21/11924 0.1%
33837	anthocyanin 3'-O-beta-glucosyltransferase activity	0.0024373	0.021741	9/1839 0.4%	21/11924 0.1%
70547	L-tyrosine aminotransferase activity	0.0024736	0.021741	4/1839 0.2%	5/11924 0.0%
4728	receptor signaling protein tyrosine phosphatase activity	0.0024736	0.021741	4/1839 0.2%	5/11924 0.0%
8677	2-dehydropantoate 2-reductase activity	0.0024736	0.021741	4/1839 0.2%	5/11924 0.0%
4838	L-tyrosine:2-oxoglutarate aminotransferase activity	0.0024736	0.021741	4/1839 0.2%	5/11924 0.0%
5310	dicarboxylic acid transmembrane transporter activity	0.0025102	0.021952	13/1839 0.7%	37/11924 0.3%
35560	pheophoridase activity	0.0025872	0.022513	7/1839 0.3%	14/11924 0.1%
16877	ligase activity, forming carbon-sulfur bonds	0.0026191	0.022677	12/1839 0.6%	33/11924 0.2%
4869	cysteine-type endopeptidase inhibitor activity	0.0026665	0.022861	11/1839 0.5%	29/11924 0.2%
16878	acid-thiol ligase activity	0.0026665	0.022861	11/1839 0.5%	29/11924 0.2%
5261	cation channel activity	0.0027664	0.023602	30/1839 1.6%	117/11924 0.9%
8194	UDP-glycosyltransferase activity	0.0028108	0.023865	64/1839 3.4%	297/11924 2.4%
8483	transaminase activity	0.0030039	0.025259	20/1839 1.0%	69/11924 0.5%
16769	transferase activity, transferring nitrogenous groups	0.0030039	0.025259	20/1839 1.0%	69/11924 0.5%
4301	epoxide hydrolase activity	0.00306	0.025607	6/1839 0.3%	11/11924 0.0%
16621	cinnamoyl-CoA reductase activity	0.0032302	0.026903	8/1839 0.4%	18/11924 0.1%
16711	flavonoid 3'-monooxygenase activity	0.0032854	0.027233	13/1839 0.7%	38/11924 0.3%
4502	kynurenine 3-monooxygenase activity	0.0036634	0.028992	3/1839 0.1%	3/11924 0.0%
47508	(R)-2-methylmalate dehydratase activity	0.0036634	0.028992	3/1839 0.1%	3/11924 0.0%
15317	phosphate:hydrogen symporter activity	0.0036634	0.028992	3/1839 0.1%	3/11924 0.0%
80108	S-alkylthiohydroximate lyase activity	0.0036634	0.028992	3/1839 0.1%	3/11924 0.0%
33793	aureusidin synthase activity	0.0036634	0.028992	3/1839 0.1%	3/11924 0.0%
33855	nicotianamine aminotransferase activity	0.0036634	0.028992	3/1839 0.1%	3/11924 0.0%
50075	maleate hydratase activity	0.0036634	0.028992	3/1839 0.1%	3/11924 0.0%
15367	oxoglutarate:malate antiporter activity	0.0036634	0.028992	3/1839 0.1%	3/11924 0.0%
3849	3-deoxy-7-phosphoheptulonate synthase activity	0.0036634	0.028992	3/1839 0.1%	3/11924 0.0%
3861	3-isopropylmalate dehydratase activity	0.0036634	0.028992	3/1839 0.1%	3/11924 0.0%
4857	enzyme inhibitor activity	0.0041773	0.032911	29/1839 1.5%	115/11924 0.9%
4364	glutathione transferase activity	0.0044293	0.034739	15/1839 0.8%	48/11924 0.4%
15293	symporter activity	0.0045031	0.03516	38/1839 2.0%	162/11924 1.3%
5342	organic acid transmembrane transporter activity	0.0047432	0.036708	36/1839 1.9%	152/11924 1.2%
46943	carboxylic acid transmembrane transporter activity	0.0047432	0.036708	36/1839 1.9%	152/11924 1.2%
47254	2,4-dihydroxy-7-methoxy-2H-1,4-benzoxazin-3(4H)-one 2-D-glucosyltransferase activity	0.0050441	0.038027	10/1839 0.5%	27/11924 0.2%
4970	ionotropic glutamate receptor activity	0.0050441	0.038027	10/1839 0.5%	27/11924 0.2%
5231	excitatory extracellular ligand-gated ion channel activity	0.0050441	0.038027	10/1839 0.5%	27/11924 0.2%
5230	extracellular ligand-gated ion channel activity	0.0050441	0.038027	10/1839 0.5%	27/11924 0.2%
5234	extracellular-glutamate-gated ion channel activity	0.0050441	0.038027	10/1839 0.5%	27/11924 0.2%
8066	glutamate receptor activity	0.0050441	0.038027	10/1839 0.5%	27/11924 0.2%
50636	vinorine synthase activity	0.0053264	0.039982	6/1839 0.3%	12/11924 0.1%
4715	non-membrane spanning protein tyrosine kinase activity	0.0054028	0.040382	22/1839 1.1%	82/11924 0.6%
15171	amino acid transmembrane transporter activity	0.0055545	0.040991	26/1839 1.4%	102/11924 0.8%
22836	gated channel activity	0.0055545	0.040991	26/1839 1.4%	102/11924 0.8%
22839	ion gated channel activity	0.0055545	0.040991	26/1839 1.4%	102/11924 0.8%
50661	NADP or NADPH binding	0.0062033	0.04556	21/1839 1.1%	78/11924 0.6%
47196	long-chain-alcohol O-fatty-acyltransferase activity	0.0063445	0.04556	5/1839 0.2%	9/11924 0.0%
16748	succinyltransferase activity	0.0063445	0.04556	5/1839 0.2%	9/11924 0.0%
46912	transferase activity, transferring acyl groups, acyl groups converted into alkyl on transfer	0.0063445	0.04556	5/1839 0.2%	9/11924 0.0%
80075	spermidine:feruloyl CoA N-acyltransferase activity	0.0064995	0.04556	7/1839 0.3%	16/11924 0.1%
80074	spermidine:caffeoyl CoA N-acyltransferase activity	0.0064995	0.04556	7/1839 0.3%	16/11924 0.1%
80073	spermidine:coumaroyl CoA N-acyltransferase activity	0.0064995	0.04556	7/1839 0.3%	16/11924 0.1%
80072	spermidine:sinapoyl CoA N-acyltransferase activity	0.0064995	0.04556	7/1839 0.3%	16/11924 0.1%
166	nucleotide binding	0.0065028	0.04556	535/1839 29.0%	3183/11924 26.6%
4708	MAP kinase kinase activity	0.0065122	0.04556	4/1839 0.2%	6/11924 0.0%
17077	oxidative phosphorylation uncoupler activity	0.0065122	0.04556	4/1839 0.2%	6/11924 0.0%
9703	nitrate reductase (NADH) activity	0.0065122	0.04556	4/1839 0.2%	6/11924 0.0%
10326	methionine-oxo-acid transaminase activity	0.0065122	0.04556	4/1839 0.2%	6/11924 0.0%
43295	glutathione binding	0.0068341	0.047621	13/1839 0.7%	41/11924 0.3%
47792	cyanohydrin beta-glucosyltransferase activity	0.0069821	0.048459	8/1839 0.4%	20/11924 0.1%

## Sheet: Up_cellular_component
GO-ID	Description	p-val	adj p-val	cluster freq	total freq
31224	intrinsic to membrane	6.9796e-28	3.8039e-25	637/1750 36.4%	2953/11539 25.5%
16020	membrane	8.5448e-26	2.3285e-23	1125/1750 64.2%	6101/11539 52.8%
16021	integral to membrane	1.1918e-23	2.165e-21	594/1750 33.9%	2796/11539 24.2%
5886	plasma membrane	4.5985e-23	6.2655e-21	789/1750 45.0%	3994/11539 34.6%
44425	membrane part	1.4415e-19	1.5712e-17	796/1750 45.4%	4138/11539 35.8%
5773	vacuole	5.4849e-16	4.9821e-14	398/1750 22.7%	1845/11539 15.9%
5783	endoplasmic reticulum	6.9679e-16	5.425e-14	291/1750 16.6%	1251/11539 10.8%
5615	extracellular space	2.7911e-08	1.9015e-06	58/1750 3.3%	187/11539 1.6%
44432	endoplasmic reticulum part	4.3756e-08	2.5226e-06	159/1750 9.0%	703/11539 6.0%
71212	subsynaptic reticulum	4.6287e-08	2.5226e-06	160/1750 9.1%	709/11539 6.1%
5576	extracellular region	1.0996e-07	5.4482e-06	224/1750 12.8%	1076/11539 9.3%
42579	microbody	1.8591e-07	7.7938e-06	84/1750 4.8%	322/11539 2.7%
5777	peroxisome	1.8591e-07	7.7938e-06	84/1750 4.8%	322/11539 2.7%
9705	plant-type vacuole membrane	6.7439e-07	2.6253e-05	50/1750 2.8%	166/11539 1.4%
325	plant-type vacuole	1.6061e-06	5.4938e-05	72/1750 4.1%	277/11539 2.4%
30312	external encapsulating structure	1.6128e-06	5.4938e-05	209/1750 11.9%	1026/11539 8.8%
48046	apoplast	1.976e-06	6.3348e-05	136/1750 7.7%	617/11539 5.3%
5788	endoplasmic reticulum lumen	3.7262e-06	0.00010959	24/1750 1.3%	61/11539 0.5%
5789	endoplasmic reticulum membrane	3.8206e-06	0.00010959	141/1750 8.0%	652/11539 5.6%
42175	nuclear membrane-endoplasmic reticulum network	8.9051e-06	0.00024266	141/1750 8.0%	662/11539 5.7%
5618	cell wall	1.5345e-05	0.00039825	194/1750 11.0%	972/11539 8.4%
44421	extracellular region part	1.936e-05	0.00046266	73/1750 4.1%	301/11539 2.6%
44459	plasma membrane part	1.9525e-05	0.00046266	334/1750 19.0%	1811/11539 15.6%
44444	cytoplasmic part	2.3234e-05	0.00052761	1215/1750 69.4%	7519/11539 65.1%
31090	organelle membrane	0.00012106	0.0026391	419/1750 23.9%	2377/11539 20.5%
5740	mitochondrial envelope	0.0001493	0.0031295	82/1750 4.6%	368/11539 3.1%
44429	mitochondrial part	0.00016634	0.0033577	101/1750 5.7%	474/11539 4.1%
5737	cytoplasm	0.00051286	0.0099824	1321/1750 75.4%	8337/11539 72.2%
5743	mitochondrial inner membrane	0.00070849	0.013315	55/1750 3.1%	238/11539 2.0%
5887	integral to plasma membrane	0.001163	0.021127	50/1750 2.8%	216/11539 1.8%
44437	vacuolar part	0.0012466	0.021916	192/1750 10.9%	1038/11539 8.9%
31225	anchored to membrane	0.0013662	0.023269	41/1750 2.3%	170/11539 1.4%
31226	intrinsic to plasma membrane	0.0014712	0.024297	69/1750 3.9%	322/11539 2.7%
31966	mitochondrial membrane	0.0016913	0.027111	73/1750 4.1%	346/11539 2.9%
5774	vacuolar membrane	0.002007	0.031252	186/1750 10.6%	1012/11539 8.7%
32839	dendrite cytoplasm	0.0023181	0.035093	4/1750 0.2%	5/11539 0.0%
9505	plant-type cell wall	0.0025564	0.037656	105/1750 6.0%	535/11539 4.6%
